# Supplementary material
Source: PubMed Central journal article supplement (PMC3807732)
Supplement: NIHMS517151-supplement-Suppdata.pdf [file NIHMS517151-supplement-Suppdata.pdf]

| Strain                                                 | Sequences Analyzed | All genes |           | Core genes      |                 |
|--------------------------------------------------------|--------------------|-----------|-----------|-----------------|-----------------|
|                                                        |                    | % Leading | % Lagging | # Genes Leading | # Genes Lagging |
| <i>B. subtilis</i> subsp. <i>subtilis</i> str. 168     | 4176               | 73        | 27        | 627             | 132             |
| <i>B. subtilis</i> BSn5                                | 4145               | 74        | 26        |                 |                 |
| <i>B. subtilis</i> subsp. <i>subtilis</i> str. RO-NN-1 | 4101               | 71        | 29        |                 |                 |
| <i>B. subtilis</i> subsp. <i>spizizenii</i> TU-B-10    | 4297               | 73        | 27        |                 |                 |
| <i>B. subtilis</i> subsp. <i>spizizenii</i> str. W23   | 4062               | 73        | 27        |                 |                 |

**Supplementary Table 1.** Distribution of genes between leading and lagging strand in the 5 *Bacillus subtilis* strains used in the bioinformatics analysis.

| <b>Leading strand genes</b> |                   |                                                         |                    |
|-----------------------------|-------------------|---------------------------------------------------------|--------------------|
| <b>Name</b>                 | <b>CDS-region</b> | <b>Product</b>                                          | <b>Length (AA)</b> |
| <i>dnaA</i>                 | 410-1750          | chromosome replication initiator DnaA                   | 446                |
| <i>yaaA</i>                 | 3206-3421         | RNA binding protein                                     | 71                 |
| <i>recF</i>                 | 3437-4549         | recombination protein F                                 | 370                |
| <i>yaaB</i>                 | 4567-4812         | hypothetical protein                                    | 81                 |
| <i>dacA</i>                 | 17534-18865       | D-alanyl-D-alanine carboxypeptidase                     | 443                |
| <i>yaaD</i>                 | 19062-19946       | pyridoxal biosynthesis lyase PdxS                       | 294                |
| <i>recR</i>                 | 28867-29463       | recombination protein RecR                              | 198                |
| <i>yaaL</i>                 | 29481-29705       | hypothetical protein                                    | 74                 |
| <i>yaaQ</i>                 | 39871-40200       | hypothetical protein                                    | 109                |
| <i>holB</i>                 | 40665-41654       | DNA polymerase III subunit delta'                       | 329                |
| <i>yaaT</i>                 | 41657-42484       | hypothetical protein                                    | 275                |
| <i>yabA</i>                 | 42499-42858       | DNA replication initiation control protein YabA         | 119                |
| <i>yabE</i>                 | 48629-49942       | cell wall shaping enzyme                                | 437                |
| <i>veg</i>                  | 52763-53023       | hypothetical protein                                    | 86                 |
| <i>sspF</i>                 | 53183-53368       | small acid-soluble spore protein                        | 61                 |
| <i>ipk</i>                  | 53516-54385       | 4-diphosphocytidyl-2-C-methyl-D-erythritol kinase       | 289                |
| <i>purR</i>                 | 54441-55298       | pur operon repressor                                    | 285                |
| <i>spoVG</i>                | 55866-56159       | regulatory protein SpoVG                                | 97                 |
| <i>prs</i>                  | 57745-58698       | ribose-phosphate pyrophosphokinase                      | 317                |
| <i>pth</i>                  | 59504-60070       | peptidyl-tRNA hydrolase                                 | 188                |
| <i>yabK</i>                 | 60130-60360       | hypothetical protein                                    | 76                 |
| <i>yabP</i>                 | 68216-68518       | spore protein involved in the shaping of the spore coat | 100                |
| <i>yabQ</i>                 | 68515-69150       | membrane protein of the forespore                       | 211                |
| <i>divIC</i>                | 69168-69545       | cell-division initiation protein                        | 125                |
| <i>yabR</i>                 | 69626-70012       | hypothetical protein                                    | 128                |
| <i>yabS</i>                 | 73106-73843       | hypothetical protein                                    | 245                |
| <i>tilS</i>                 | 74929-76347       | tRNA <sup>ile</sup> lysidine synthetase                 | 472                |
| <i>hprT</i>                 | 76344-76886       | hypoxanthine-guanine phosphoribosyltransferase          | 180                |
| <i>ftsH</i>                 | 76984-78897       | cell-division protein and general stress protein        | 637                |
| <i>coaX</i>                 | 79092-79868       | pantothenate kinase                                     | 258                |
| <i>hslO</i>                 | 79880-80755       | heat shock protein 33                                   | 291                |
| <i>cysK</i>                 | 81771-82697       | cysteine synthase                                       | 308                |
| <i>yazB</i>                 | 87401-87610       | transcriptional regulator                               | 69                 |
| <i>lysS</i>                 | 88727-90226       | lysyl-tRNA synthetase                                   | 499                |
| <i>ctsR</i>                 | 101449-101913     | transcriptional regulator                               | 154                |
| <i>mcsA</i>                 | 101927-102484     | activator of protein kinase McsB                        | 185                |
| <i>mcsB</i>                 | 102484-103575     | ATP-guanido phosphotransferase                          | 363                |
| <i>yacK</i>                 | 107476-108558     | DNA integrity scanning protein DisA                     | 360                |

|             |               |                                            |      |
|-------------|---------------|--------------------------------------------|------|
| <i>yacL</i> | 108674-109774 | hypothetical protein                       | 366  |
| <i>gltX</i> | 111047-112498 | glutamyl-tRNA synthetase                   | 483  |
| <i>cysE</i> | 112800-113453 | serine acetyltransferase                   | 217  |
| <i>rlmB</i> | 115269-116018 | 23S rRNA methyltransferase                 | 249  |
| <i>yacP</i> | 116025-116537 | ribonuclease with PIN and NYN domains      | 170  |
| <i>sigH</i> | 116600-117256 | RNA polymerase factor sigma-70             | 218  |
| <i>rpmG</i> | 117349-117498 | 50S ribosomal protein L33                  | 49   |
| <i>secE</i> | 117532-117711 | preprotein translocase subunit SecE        | 59   |
| <i>nusG</i> | 117890-118423 | transcription antitermination protein NusG | 177  |
| <i>rplK</i> | 118591-119016 | 50S ribosomal protein L11                  | 141  |
| <i>rplA</i> | 119111-119809 | 50S ribosomal protein L1                   | 232  |
| <i>rplL</i> | 120607-120978 | 50S ribosomal protein L7/L12               | 123  |
| <i>ybxB</i> | 121068-121673 | ribosomal RNA methyltransferase            | 201  |
| <i>rpoB</i> | 121919-125500 | DNA-directed RNA polymerase subunit beta   | 1193 |
| <i>rpoC</i> | 125562-129161 | DNA-directed RNA polymerase subunit beta'  | 1199 |
| <i>ybxF</i> | 129340-129588 | ribosomal protein L7Ae-like                | 82   |
| <i>rpsL</i> | 129702-130118 | 30S ribosomal protein S12                  | 138  |
| <i>rpsG</i> | 130160-130630 | 30S ribosomal protein S7                   | 156  |
| <i>fusA</i> | 130684-132762 | elongation factor G                        | 692  |
| <i>tufA</i> | 132882-134072 | elongation factor Tu                       | 396  |
| <i>rpsJ</i> | 135364-135672 | 30S ribosomal protein S10                  | 102  |
| <i>rplC</i> | 135712-136341 | 50S ribosomal protein L3                   | 209  |
| <i>rplD</i> | 136369-136992 | 50S ribosomal protein L4                   | 207  |
| <i>rplW</i> | 136992-137279 | 50S ribosomal protein L23                  | 95   |
| <i>rplB</i> | 137311-138144 | 50S ribosomal protein L2                   | 277  |
| <i>rpsS</i> | 138202-138480 | 30S ribosomal protein S19                  | 92   |
| <i>rplV</i> | 138497-138838 | 50S ribosomal protein L22                  | 113  |
| <i>rpsC</i> | 138842-139498 | 30S ribosomal protein S3                   | 218  |
| <i>rplP</i> | 139500-139934 | 50S ribosomal protein L16                  | 144  |
| <i>rpmC</i> | 139924-140124 | 50S ribosomal protein L29                  | 66   |
| <i>rpsQ</i> | 140147-140410 | 30S ribosomal protein S17                  | 87   |
| <i>rplX</i> | 140857-141168 | 50S ribosomal protein L24                  | 103  |
| <i>rplE</i> | 141195-141734 | 50S ribosomal protein L5                   | 179  |
| <i>rpsH</i> | 141974-142372 | 30S ribosomal protein S8                   | 132  |
| <i>rplF</i> | 142402-142941 | 50S ribosomal protein L6                   | 179  |
| <i>rplR</i> | 142974-143336 | 50S ribosomal protein L18                  | 120  |
| <i>rpsE</i> | 143361-143861 | 30S ribosomal protein S5                   | 166  |
| <i>rpmD</i> | 143875-144054 | 50S ribosomal protein L30                  | 59   |
| <i>rplO</i> | 144085-144525 | 50S ribosomal protein L15                  | 146  |
| <i>secY</i> | 144527-145822 | preprotein translocase subunit SecY        | 431  |
| <i>adk</i>  | 145877-146530 | adenylate kinase                           | 217  |

|              |               |                                                         |     |
|--------------|---------------|---------------------------------------------------------|-----|
| <i>mapA</i>  | 146527-147273 | methionine aminopeptidase                               | 248 |
| <i>infA</i>  | 147585-147803 | translation initiation factor IF-1                      | 72  |
| <i>rpsM</i>  | 147973-148338 | 30S ribosomal protein S13                               | 121 |
| <i>rpsK</i>  | 148359-148754 | 30S ribosomal protein S11                               | 131 |
| <i>rpoA</i>  | 148931-149875 | DNA-directed RNA polymerase subunit alpha               | 314 |
| <i>rplQ</i>  | 149953-150315 | 50S ribosomal protein L17                               | 120 |
| <i>cbiO</i>  | 150443-151288 | cobalt transporter ATP-binding subunit                  | 281 |
| <i>truA</i>  | 152937-153680 | tRNA pseudouridine synthase A                           | 247 |
| <i>rplM</i>  | 153842-154279 | 50S ribosomal protein L13                               | 145 |
| <i>rpsI</i>  | 154300-154692 | 30S ribosomal protein S9                                | 130 |
| <i>ybaK</i>  | 156109-156552 | alkylated deoxynucleotide triphosphohydrolase           | 147 |
| <i>kbaA</i>  | 159182-159778 | hypothetical protein                                    | 198 |
| <i>sigW</i>  | 194849-195412 | RNA polymerase sigma factor SigW                        | 187 |
| <i>rsiW</i>  | 195426-196052 | anti-sigma(W) factor                                    | 208 |
| <i>ybbP</i>  | 196213-197034 | hypothetical protein                                    | 273 |
| <i>glmS</i>  | 200277-202079 | glucosamine--fructose-6-phosphate aminotransferase      | 600 |
| <i>csgA</i>  | 228066-228314 | sporulation-specific SASP protein                       | 82  |
| <i>ybxH</i>  | 228331-228522 | hypothetical protein                                    | 63  |
| <i>ybfQ</i>  | 252514-253482 | hypothetical protein                                    | 322 |
| <i>tatAD</i> | 285775-285987 | twin-arginine pre-protein translocation pathway protein | 70  |
| <i>yceE</i>  | 313396-313974 | stress adaptation protein                               | 192 |
| <i>opuAB</i> | 322271-323119 | glycine betaine ABC transporter permease                | 282 |
| <i>aroK</i>  | 340025-340585 | shikimate kinase                                        | 186 |
| <i>ycgM</i>  | 344551-345462 | proline oxidase                                         | 303 |
| <i>ycgP</i>  | 348724-349959 | transcriptional regulator                               | 411 |
| <i>hxlR</i>  | 376032-376394 | positive regulator of hxlAB expression                  | 120 |
| <i>comS</i>  | 390880-391020 | regulator of genetic competence                         | 46  |
| <i>rapC</i>  | 428831-429979 | response regulator aspartate phosphatase                | 382 |
| <i>phrC</i>  | 429963-430085 | secreted regulator of the activity of phosphatase RapC  | 40  |
| <i>yclN</i>  | 432372-433322 | iron-siderophore ABC transporter permease               | 316 |
| <i>yclO</i>  | 433315-434262 | iron-siderophore ABC transporter permease               | 315 |
| <i>ydaG</i>  | 473803-474225 | general stress protein                                  | 140 |
| <i>gsiB</i>  | 494506-494877 | general stress protein                                  | 123 |
| <i>dctP</i>  | 500166-501431 | C4-dicarboxylate transporter DctA                       | 421 |
| <i>ydbL</i>  | 504689-505024 | hypothetical protein                                    | 111 |
| <i>ddl</i>   | 508248-509312 | D-alanyl-alanine synthetase A                           | 354 |
| <i>csxA</i>  | 511106-512641 | ATP-dependent RNA helicase; cold shock                  | 511 |
| <i>ndoA</i>  | 518943-519293 | endoribonuclease toxin                                  | 116 |
| <i>rsbU</i>  | 521019-522026 | serine phosphatase                                      | 335 |

|              |                 |                                                         |     |
|--------------|-----------------|---------------------------------------------------------|-----|
| <i>cspC</i>  | 559264-559464   | cold-shock protein                                      | 66  |
| <i>rimI</i>  | 642810-643265   | ribosomal protein S18 alanine N-acetyltransferase       | 151 |
| <i>moaC</i>  | 646582-647094   | molybdenum cofactor biosynthesis protein MoaC           | 170 |
| <i>ydiH</i>  | 647091-647738   | redox-sensing transcriptional repressor Rex             | 215 |
| <i>tatAY</i> | 647760-647933   | twin-arginine pre-protein translocation pathway protein | 57  |
| <i>groES</i> | 649903-650187   | co-chaperonin GroES                                     | 94  |
| <i>groEL</i> | 650234-651868   | molecular chaperone GroEL                               | 544 |
| <i>ydjM</i>  | 679390-679761   | hypothetical protein                                    | 123 |
| <i>guaA</i>  | 692740-694281   | GMP synthase                                            | 513 |
| <i>yebE</i>  | 697538-698092   | hypothetical protein                                    | 184 |
| <i>yebG</i>  | 698092-698289   | hypothetical protein                                    | 65  |
| <i>purE</i>  | 698612-699100   | phosphoribosylaminoimidazole carboxylase I              | 162 |
| <i>purB</i>  | 700232-701527   | adenylosuccinate lyase                                  | 431 |
| <i>purS</i>  | 702319-702573   | phosphoribosylformylglycinamide synthase subunit PurS   | 84  |
| <i>purQ</i>  | 702570-703253   | phosphoribosylformylglycinamide synthase I              | 227 |
| <i>yerC</i>  | 716431-716745   | hypothetical protein                                    | 104 |
| <i>gatC</i>  | 728732-729022   | aspartyl/glutamyl-tRNA amidotransferase subunit C       | 96  |
| <i>gatA</i>  | 729038-730495   | aspartyl/glutamyl-tRNA amidotransferase subunit A       | 485 |
| <i>gatB</i>  | 730509-731939   | aspartyl/glutamyl-tRNA amidotransferase subunit B       | 476 |
| <i>yerQ</i>  | 736436-737347   | lipid kinase                                            | 303 |
| <i>cotJA</i> | 755907-756155   | inner spore coat protein                                | 82  |
| <i>cotJC</i> | 756417-756986   | inner spore coat protein                                | 189 |
| <i>yesY</i>  | 774138-774791   | rhamnogalacturonan acetyltransferase                    | 217 |
| <i>lplA</i>  | 779529-781037   | lipoprotein                                             | 502 |
| <i>yfnH</i>  | 798469-799233   | sugar-phosphate cytidyltransferase                      | 254 |
| <i>yfnP</i>  | 812140-812562   | MerR family transcriptional regulator                   | 140 |
| <i>yflS</i>  | 829382-830818   | 2-oxoglutarate/malate transporter                       | 478 |
| <i>citM</i>  | 834383-835684   | transporter of divalent metal ions/citrate complexes    | 433 |
| <i>yfjT</i>  | 869273-869458   | hypothetical protein                                    | 61  |
| <i>sspE</i>  | 937900-938154   | small acid-soluble spore protein                        | 84  |
| <i>ygaC</i>  | 938731-939261   | hypothetical protein                                    | 176 |
| <i>perR</i>  | 944487-944924   | Fur family transcriptional regulator                    | 145 |
| <i>rpsN</i>  | 965909-966178   | 30S ribosomal protein S14                               | 89  |
| <i>cspR</i>  | 970135-970617   | rRNA methylase                                          | 160 |
| <i>yhcC</i>  | 979939-980313   | hypothetical protein                                    | 124 |
| <i>yhcU</i>  | 996643-997038   | hypothetical protein                                    | 131 |
| <i>yhcV</i>  | 997175-997597   | oxidoreductase                                          | 140 |
| <i>plsC</i>  | 1031395-1031994 | 1-acylglycerol-3-phosphate O-acyltransferase            | 199 |
| <i>yhdX</i>  | 1038653-1038760 | hypothetical protein                                    | 35  |
| <i>yheA</i>  | 1054746-1055099 | hypothetical protein                                    | 117 |

|              |                 |                                                             |     |
|--------------|-----------------|-------------------------------------------------------------|-----|
| <i>yhzE</i>  | 1071402-1071488 | hypothetical protein                                        | 28  |
| <i>yhaI</i>  | 1072768-1073109 | hypothetical protein                                        | 113 |
| <i>yhzF</i>  | 1074381-1074572 | hypothetical protein                                        | 63  |
| <i>ecsA</i>  | 1077440-1078183 | ABC transporter ATP-binding protein                         | 247 |
| <i>yhjE</i>  | 1121550-1122173 | hypothetical protein                                        | 207 |
| <i>sipV</i>  | 1122175-1122681 | type I signal peptidase                                     | 168 |
| <i>yhjM</i>  | 1129715-1130704 | transcriptional regulator of the ntd operon; (LacI family)  | 329 |
| <i>yisL</i>  | 1153265-1153621 | hypothetical protein                                        | 118 |
| <i>yisR</i>  | 1162267-1163130 | AraC family transcriptional regulator                       | 287 |
| <i>yitT</i>  | 1188689-1189531 | hypothetical protein                                        | 280 |
| <i>comZ</i>  | 1207597-1207788 | late competence gene                                        | 63  |
| <i>appD</i>  | 1211477-1212463 | oligopeptide ABC transporter ATP-binding protein            | 328 |
| <i>yjbA</i>  | 1217326-1218078 | nucleic acid binding protein                                | 250 |
| <i>oppC</i>  | 1222533-1223450 | oligopeptide ABC transporter permease                       | 305 |
| <i>yjbC</i>  | 1226938-1227516 | thiol oxidation management factor; acetyltransferase        | 192 |
| <i>spxA</i>  | 1227697-1228092 | transcriptional regulator Spx                               | 131 |
| <i>mecA</i>  | 1229068-1229724 | adaptor protein                                             | 218 |
| <i>yjbL</i>  | 1236609-1236977 | phosphatase                                                 | 122 |
| <i>rex</i>   | 1298612-1299034 | transcriptional repressor of the rex ndh operon             | 140 |
| <i>ndh</i>   | 1299074-1300252 | NADH dehydrogenase                                          | 392 |
| <i>exuM</i>  | 1301939-1303318 | Na <sup>+</sup> -altronate/mannonate symporter              | 459 |
| <i>yjoB</i>  | 1314453-1315724 | ATPase possibly involved in protein degradation             | 423 |
| <i>rapA</i>  | 1315869-1317005 | response regulator aspartate phosphatase                    | 378 |
| <i>xkdF</i>  | 1328702-1329529 | hypothetical protein                                        | 275 |
| <i>xkdG</i>  | 1329555-1330490 | capsid protein of PBSX prophage                             | 311 |
| <i>dppB</i>  | 1361242-1362168 | dipeptide ABC transporter permease                          | 308 |
| <i>ykzD</i>  | 1395371-1395508 | hypothetical protein                                        | 45  |
| <i>ykzB</i>  | 1397938-1398093 | hypothetical protein                                        | 51  |
| <i>ykoM</i>  | 1398496-1398960 | MarR family transcriptional regulator                       | 154 |
| <i>sigI</i>  | 1411892-1412647 | RNA polymerase sigma factor SigI                            | 251 |
| <i>spo0E</i> | 1430684-1430941 | negative regulatory phosphatase acting on Spo0A-P           | 85  |
| <i>mhqR</i>  | 1433199-1433636 | MarR family transcriptional regulator                       | 145 |
| <i>queD</i>  | 1440100-1440549 | 6-pyruvoyl tetrahydrobiopterin synthase                     | 149 |
| <i>ykzS</i>  | 1448013-1448207 | hypothetical protein                                        | 64  |
| <i>glcT</i>  | 1456092-1456958 | transcriptional antiterminator BglG family                  | 288 |
| <i>ptsH</i>  | 1459384-1459650 | phosphocarrier protein HPr                                  | 88  |
| <i>ptsI</i>  | 1459650-1461362 | phosphotransferase system (PTS) enzyme I                    | 570 |
| <i>kinA</i>  | 1470026-1471846 | sporulation-specific ATP-dependent protein histidine kinase | 606 |
| <i>ykuJ</i>  | 1484117-1484356 | hypothetical protein                                        | 79  |
| <i>ykuK</i>  | 1484466-1484984 | RNase                                                       | 172 |

|              |                 |                                                                       |     |
|--------------|-----------------|-----------------------------------------------------------------------|-----|
| <i>ykzF</i>  | 1485118-1485315 | hypothetical protein                                                  | 65  |
| <i>dapH</i>  | 1488973-1489683 | tetrahydrodipicolinate N-acetyltransferase                            | 236 |
| <i>ykuS</i>  | 1490939-1491184 | hypothetical protein                                                  | 81  |
| <i>rok</i>   | 1493787-1494362 | repressor of comK                                                     | 191 |
| <i>fruR</i>  | 1507578-1508333 | DeoR family transcriptional regulator                                 | 251 |
| <i>sipT</i>  | 1511308-1511889 | type I signal peptidase                                               | 193 |
| <i>pdhA</i>  | 1528326-1529441 | pyruvate dehydrogenase (E1 alpha subunit)                             | 371 |
| <i>pdhB</i>  | 1529445-1530422 | pyruvate dehydrogenase (E1 beta subunit)                              | 325 |
| <i>pdhC</i>  | 1530537-1531865 | branched-chain alpha-keto acid dehydrogenase subunit E2               | 442 |
| <i>pdhD</i>  | 1531870-1533282 | dihydrolipoamide dehydrogenase                                        | 470 |
| <i>ykzW</i>  | 1534120-1534239 | hypothetical protein                                                  | 39  |
| <i>ykzI</i>  | 1537113-1537301 | hypothetical protein                                                  | 62  |
| <i>bipA</i>  | 1546121-1547959 | GTPase                                                                | 612 |
| <i>ylaH</i>  | 1548016-1548333 | hypothetical protein                                                  | 105 |
| <i>ylaN</i>  | 1552412-1552693 | hypothetical protein                                                  | 93  |
| <i>ctaB</i>  | 1559309-1560226 | protoheme IX farnesyltransferase                                      | 305 |
| <i>ylbD</i>  | 1567651-1568049 | hypothetical protein                                                  | 132 |
| <i>ylbE</i>  | 1568065-1568304 | hypothetical protein                                                  | 79  |
| <i>ylbF</i>  | 1568420-1568869 | regulatory protein                                                    | 149 |
| <i>ylbG</i>  | 1568924-1569196 | hypothetical protein                                                  | 90  |
| <i>ylbH</i>  | 1569519-1570073 | hypothetical protein                                                  | 184 |
| <i>ylbL</i>  | 1572765-1573790 | degradative enzyme                                                    | 341 |
| <i>ylbN</i>  | 1575264-1575782 | hypothetical protein                                                  | 172 |
| <i>rpmF</i>  | 1575804-1575983 | 50S ribosomal protein L32                                             | 59  |
| <i>ylbO</i>  | 1576129-1576710 | spore coat protein regulator protein YlbO                             | 193 |
| <i>yllB</i>  | 1580121-1580552 | cell division protein MraZ                                            | 143 |
| <i>ftsL</i>  | 1581597-1581950 | cell-division protein                                                 | 117 |
| <i>mraY</i>  | 1587926-1588900 | phospho-N-acetylmuramoyl-pentapeptide-transferase                     | 324 |
| <i>spoVE</i> | 1590317-1591417 | factor for spore cortex peptidoglycan synthesis (stage V sporulation) | 366 |
| <i>murB</i>  | 1592663-1593574 | UDP-N-acetylenolpyruvoylglucosamine reductase                         | 303 |
| <i>divIB</i> | 1593704-1594495 | cell-division initiation protein                                      | 263 |
| <i>sbp</i>   | 1595935-1596300 | hypothetical protein                                                  | 121 |
| <i>ftsA</i>  | 1596474-1597796 | cell-division protein essential fo Z-ring assembly                    | 440 |
| <i>ftsZ</i>  | 1597832-1598980 | cell division protein FtsZ                                            | 382 |
| <i>sigG</i>  | 1605630-1606412 | sporulation sigma factor SigG                                         | 260 |
| <i>ylmC</i>  | 1608919-1609164 | hypothetical protein                                                  | 81  |
| <i>ylmE</i>  | 1610170-1610862 | hypothetical protein                                                  | 230 |
| <i>ylmG</i>  | 1611321-1611593 | factor involved in shape determination                                | 90  |
| <i>ylmH</i>  | 1611654-1612427 | factor involved in shape determination, RNA-                          | 257 |

|               |                 | binding fold                                                        |     |
|---------------|-----------------|---------------------------------------------------------------------|-----|
| <i>divIVA</i> | 1612521-1613015 | cell-division initiation protein                                    | 164 |
| <i>lspA</i>   | 1616744-1617208 | lipoprotein signal peptidase                                        | 154 |
| <i>cysH</i>   | 1630382-1631083 | (phospho)adenosine phosphosulfate reductase                         | 233 |
| <i>sumT</i>   | 1634061-1634834 | uroporphyrinogen III and precorrin-1 C-methyltransferase            | 257 |
| <i>yloC</i>   | 1640720-1641595 | hypothetical protein                                                | 291 |
| <i>ylzA</i>   | 1641672-1641941 | hypothetical protein                                                | 89  |
| <i>gmk</i>    | 1641949-1642563 | guanylate kinase                                                    | 204 |
| <i>rpoZ</i>   | 1642567-1642770 | DNA-directed RNA polymerase subunit omega                           | 67  |
| <i>prpC</i>   | 1650384-1651148 | phosphorylated protein phosphatase                                  | 254 |
| <i>yloQ</i>   | 1653103-1653999 | ribosome-associated GTPase                                          | 298 |
| <i>yloU</i>   | 1656064-1656426 | hypothetical protein                                                | 120 |
| <i>sdaAB</i>  | 1658242-1658904 | L-serine dehydratase subunit beta                                   | 220 |
| <i>ylpC</i>   | 1661967-1662533 | fatty acid biosynthesis transcriptional regulator                   | 188 |
| <i>plsX</i>   | 1662547-1663548 | glycerol-3-phosphate acyltransferase PlsX                           | 333 |
| <i>acpP</i>   | 1665337-1665570 | acyl carrier protein                                                | 77  |
| <i>rnc</i>    | 1665710-1666459 | ribonuclease III                                                    | 249 |
| <i>ylxM</i>   | 1671828-1672160 | DNA-binding protein                                                 | 110 |
| <i>ffh</i>    | 1672174-1673514 | signal recognition particle-like (SRP) GTPase                       | 446 |
| <i>rpsP</i>   | 1673620-1673892 | 30S ribosomal protein S16                                           | 90  |
| <i>ylqC</i>   | 1673892-1674137 | RNA binding protein                                                 | 81  |
| <i>ylqD</i>   | 1674259-1674645 | hypothetical protein                                                | 128 |
| <i>rplS</i>   | 1676033-1676389 | 50S ribosomal protein L19                                           | 118 |
| <i>sucC</i>   | 1680431-1681588 | succinyl-CoA synthetase subunit beta                                | 385 |
| <i>sucD</i>   | 1681617-1682519 | succinyl-CoA synthetase subunit alpha                               | 300 |
| <i>xerC</i>   | 1687187-1688101 | site-specific tyrosine recombinase XerC                             | 304 |
| <i>clpQ</i>   | 1688114-1688659 | ATP-dependent protease peptidase subunit                            | 181 |
| <i>codY</i>   | 1690119-1690898 | transcriptional repressor CodY                                      | 259 |
| <i>flgB</i>   | 1691278-1691667 | flagellar basal-body rod protein FlgB                               | 129 |
| <i>flgC</i>   | 1691667-1692119 | flagellar basal body rod protein FlgC                               | 150 |
| <i>fliE</i>   | 1692130-1692450 | flagellar hook-basal body protein FliE                              | 106 |
| <i>fliG</i>   | 1694119-1695135 | flagellar motor switch protein G                                    | 338 |
| <i>fliJ</i>   | 1697196-1697639 | flagellar biosynthesis chaperone                                    | 147 |
| <i>ylxF</i>   | 1697651-1698265 | kinesin-like protein                                                | 204 |
| <i>ylzI</i>   | 1701016-1701231 | flagellar protein                                                   | 71  |
| <i>fliL</i>   | 1701228-1701650 | flagellar basal body protein FliL                                   | 140 |
| <i>fliM</i>   | 1701684-1702682 | flagellar motor switch protein FliM                                 | 332 |
| <i>fliZ</i>   | 1704211-1704870 | flagella biosynthesis protein FliZ                                  | 219 |
| <i>fliP</i>   | 1704863-1705528 | flagellar biosynthesis protein FliP                                 | 221 |
| <i>cheW</i>   | 1714855-1715325 | modulation of CheA activity in response to attractants (chemotaxis) | 156 |



|               |                 |                                                        |     |
|---------------|-----------------|--------------------------------------------------------|-----|
| <i>cheC</i>   | 1715344-1715973 | signal terminating phosphatase                         | 209 |
| <i>cheD</i>   | 1715970-1716470 | sequence specific deamidase                            | 166 |
| <i>sigD</i>   | 1716493-1717257 | RNA polymerase sigma factor SigD                       | 254 |
| <i>rpsB</i>   | 1717933-1718673 | 30S ribosomal protein S2                               | 246 |
| <i>tsf</i>    | 1718775-1719656 | elongation factor Ts                                   | 293 |
| <i>pyrH</i>   | 1719802-1720524 | uridylate kinase                                       | 240 |
| <i>frr</i>    | 1720526-1721083 | ribosome recycling factor                              | 185 |
| <i>uppS</i>   | 1721214-1721996 | undecaprenyl pyrophosphate synthase                    | 260 |
| <i>cdsA</i>   | 1722000-1722809 | phosphatidate cytidyltransferase                       | 269 |
| <i>dxr</i>    | 1722871-1724022 | 1-deoxy-D-xylulose 5-phosphate reductoisomerase        | 383 |
| <i>rseP</i>   | 1724029-1725297 | inner membrane zinc metalloprotease                    | 422 |
| <i>ylxS</i>   | 1731776-1732246 | hypothetical protein                                   | 156 |
| <i>nusA</i>   | 1732281-1733396 | transcription elongation factor NusA                   | 371 |
| <i>ylxR</i>   | 1733410-1733685 | RNA binding protein; new fold                          | 91  |
| <i>ylxQ</i>   | 1733687-1733989 | hypothetical protein                                   | 100 |
| <i>infB</i>   | 1734009-1736159 | translation initiation factor IF-2                     | 716 |
| <i>ylxP</i>   | 1736156-1736434 | hypothetical protein                                   | 92  |
| <i>rbfA</i>   | 1736451-1736804 | ribosome-binding factor A                              | 117 |
| <i>rpsO</i>   | 1738941-1739210 | 30S ribosomal protein S15                              | 89  |
| <i>spoVFA</i> | 1744367-1745260 | dipicolinate synthase subunit A                        | 297 |
| <i>asd</i>    | 1745991-1747031 | aspartate-semialdehyde dehydrogenase                   | 346 |
| <i>rnjB</i>   | 1749418-1751085 | ribonuclease J2                                        | 555 |
| <i>ymfJ</i>   | 1760464-1760721 | hypothetical protein                                   | 85  |
| <i>recA</i>   | 1764645-1765691 | recombinase A                                          | 348 |
| <i>ymdA</i>   | 1767310-1768872 | phosphodiesterase                                      | 520 |
| <i>spoVS</i>  | 1769935-1770195 | stage V sporulation protein                            | 86  |
| <i>ymcB</i>   | 1772843-1774372 | (dimethylallyl)adenosine tRNA<br>methylthiotransferase | 509 |
| <i>ymcA</i>   | 1774374-1774805 | master regulator for biofilm formation                 | 143 |
| <i>hfq</i>    | 1867373-1867594 | RNA-binding protein Hfq                                | 73  |
| <i>ymzA</i>   | 1868144-1868374 | hypothetical protein                                   | 76  |
| <i>nrdI</i>   | 1868617-1869009 | ribonucleotide reductase stimulatory protein           | 130 |
| <i>spoVK</i>  | 1874203-1875171 | mother cell sporulation ATPase                         | 322 |
| <i>glnR</i>   | 1877959-1878366 | nitrogen metabolism transcriptional regulator          | 135 |
| <i>glnA</i>   | 1878425-1879759 | glutamine synthetase                                   | 444 |
| <i>xylA</i>   | 1891908-1893245 | xylose isomerase                                       | 445 |
| <i>yneF</i>   | 1922549-1922767 | hypothetical protein                                   | 72  |
| <i>yneJ</i>   | 1924471-1924962 | hypothetical protein                                   | 163 |
| <i>ynzL</i>   | 1930074-1930199 | hypothetical protein                                   | 41  |
| <i>sspN</i>   | 1930264-1930410 | acid-soluble spore protein N                           | 48  |
| <i>gltC</i>   | 2014779-2015681 | LysR family transcriptional regulator                  | 300 |

|               |                 |                                                                                         |     |
|---------------|-----------------|-----------------------------------------------------------------------------------------|-----|
| <i>yocJ</i>   | 2096350-2096976 | azoreductase                                                                            | 208 |
| <i>yoZ</i>    | 2099446-2099790 | hypothetical protein                                                                    | 114 |
| <i>yojG</i>   | 2121641-2122306 | deacetylase                                                                             | 221 |
| <i>yoyC</i>   | 2122672-2122950 | hypothetical protein                                                                    | 92  |
| <i>yodJ</i>   | 2134566-2135387 | D-alanyl-D-alanine carboxypeptidase                                                     | 273 |
| <i>deoD</i>   | 2135470-2136171 | purine nucleoside phosphorylase                                                         | 233 |
| <i>yoZ</i>    | 2137602-2137778 | hypothetical protein                                                                    | 58  |
| <i>yodN</i>   | 2138037-2138717 | hypothetical protein                                                                    | 226 |
| <i>ypmP</i>   | 2292432-2292683 | hypothetical protein                                                                    | 83  |
| <i>ilvA</i>   | 2292769-2294037 | threonine dehydratase                                                                   | 422 |
| <i>ypeQ</i>   | 2308792-2308974 | hypothetical protein                                                                    | 60  |
| <i>ypzF</i>   | 2311986-2312132 | hypothetical protein                                                                    | 48  |
| <i>ypsB</i>   | 2331779-2332075 | cell division protein GpsB                                                              | 98  |
| <i>cotD</i>   | 2332784-2333011 | spore coat protein                                                                      | 75  |
| <i>asnC</i>   | 2346224-2347516 | asparaginyl-tRNA synthetase                                                             | 430 |
| <i>ypmB</i>   | 2348864-2349349 | hypothetical protein                                                                    | 161 |
| <i>panD</i>   | 2352592-2352975 | aspartate alpha-decarboxylase                                                           | 127 |
| <i>panB</i>   | 2353839-2354672 | 3-methyl-2-oxobutanoate hydroxymethyltransferase                                        | 277 |
| <i>mgsA</i>   | 2358911-2359324 | methylglyoxal synthase                                                                  | 137 |
| <i>ypjD</i>   | 2360155-2360490 | nucleotide phosphohydrolyase                                                            | 111 |
| <i>qcrB</i>   | 2363913-2364587 | cytochrome b6                                                                           | 224 |
| <i>qcrA</i>   | 2364589-2365092 | menaquinolcytochrome c oxidoreductase iron-sulfur subunit                               | 167 |
| <i>ndk</i>    | 2381354-2381803 | nucleoside diphosphate kinase                                                           | 149 |
| <i>hepT</i>   | 2381919-2382965 | heptaprenyl diphosphate synthase component II                                           | 348 |
| <i>ubiE</i>   | 2382907-2383608 | ubiquinone/menaquinone biosynthesis methyltransferase                                   | 233 |
| <i>hepS</i>   | 2383615-2384370 | heptaprenyl diphosphate synthase component I                                            | 251 |
| <i>mtrB</i>   | 2384534-2384761 | transcription attenuation protein MtrB                                                  | 75  |
| <i>folE</i>   | 2384783-2385355 | GTP cyclohydrolase I                                                                    | 190 |
| <i>hbs</i>    | 2385543-2385821 | non-specific DNA-binding protein HBSu; signal recognition particle-like (SRP) component | 92  |
| <i>spoIVA</i> | 2386195-2387673 | morphogenetic stage IV sporulation protein                                              | 492 |
| <i>yphE</i>   | 2388610-2388813 | hypothetical protein                                                                    | 67  |
| <i>rpsA</i>   | 2394664-2395812 | 30S ribosomal protein S1                                                                | 382 |
| <i>ypfB</i>   | 2396798-2396974 | hypothetical protein                                                                    | 58  |
| <i>gudB</i>   | 2402067-2403350 | cryptic glutamate dehydrogenase                                                         | 427 |
| <i>ypbH</i>   | 2403506-2404090 | adaptor protein                                                                         | 194 |
| <i>sigX</i>   | 2414627-2415211 | RNA polymerase sigma factor SigX                                                        | 194 |
| <i>resA</i>   | 2420804-2421343 | thiol-disulfide oxidoreductase                                                          | 179 |
| <i>ypuI</i>   | 2424654-2425193 | hypothetical protein                                                                    | 179 |
| <i>scpA</i>   | 2425831-2426586 | segregation and condensation protein A                                                  | 251 |

|                 |                 |                                                                                                            |     |
|-----------------|-----------------|------------------------------------------------------------------------------------------------------------|-----|
| <i>ypzK</i>     | 2427405-2427779 | acetyltransferase                                                                                          | 124 |
| <i>ribH</i>     | 2427892-2428356 | 6,7-dimethyl-8-ribityllumazine synthase                                                                    | 154 |
| <i>ribE</i>     | 2429600-2430247 | riboflavin synthase subunit alpha                                                                          | 215 |
| <i>ypuD</i>     | 2431737-2432081 | hypothetical protein                                                                                       | 114 |
| <i>sigF</i>     | 2443429-2444196 | sporulation sigma factor SigF                                                                              | 255 |
| <i>spoIIAA</i>  | 2444645-2444998 | anti-anti-sigma factor (antagonist of SpoIIAB)                                                             | 117 |
| <i>yqzK</i>     | 2449489-2449716 | hypothetical protein                                                                                       | 75  |
| <i>ansA</i>     | 2455819-2456808 | exported L-asparaginase                                                                                    | 329 |
| <i>yqkB</i>     | 2461873-2462196 | hypothetical protein                                                                                       | 107 |
| <i>yqjI</i>     | 2480750-2482159 | 6-phosphogluconate dehydrogenase                                                                           | 469 |
| <i>artP</i>     | 2492029-2492796 | High affinity arginine ABC transporter binding lipoprotein                                                 | 255 |
| <i>spo0A</i>    | 2518023-2518826 | response regulator                                                                                         | 267 |
| <i>xseB</i>     | 2526669-2526923 | exodeoxyribonuclease VII small subunit                                                                     | 84  |
| <i>folD</i>     | 2528404-2529255 | bifunctional 5,10-methylene-tetrahydrofolate dehydrogenase/ 5,10-methylene-tetrahydrofolate cyclohydrolase | 283 |
| <i>nusB</i>     | 2529267-2529662 | transcription antitermination protein NusB                                                                 | 131 |
| <i>yqhY</i>     | 2529926-2530333 | hypothetical protein                                                                                       | 135 |
| <i>accC</i>     | 2530354-2531706 | acetyl-CoA carboxylase biotin carboxylase subunit                                                          | 450 |
| <i>accB</i>     | 2531718-2532197 | acetyl-CoA carboxylase biotin carboxyl carrier protein subunit                                             | 159 |
| <i>spoIIIAG</i> | 2533010-2533699 | stage III sporulation engulfment assembly protein                                                          | 229 |
| <i>spoIIIAF</i> | 2533692-2534312 | stage III sporulation protein                                                                              | 206 |
| <i>spoIIIAD</i> | 2535544-2535945 | stage III sporulation protein                                                                              | 133 |
| <i>spoIIIAC</i> | 2535952-2536158 | stage III sporulation protein                                                                              | 68  |
| <i>efp</i>      | 2538115-2538672 | elongation factor P                                                                                        | 185 |
| <i>yqhO</i>     | 2542439-2543314 | hypothetical protein                                                                                       | 291 |
| <i>mntR</i>     | 2543440-2543868 | manganese transport transcriptional regulator                                                              | 142 |
| <i>mgsR</i>     | 2564026-2564406 | transcriptional regulator of stress                                                                        | 126 |
| <i>pstS</i>     | 2580715-2581617 | phosphate ABC transporter binding lipoprotein                                                              | 300 |
| <i>sodA</i>     | 2585434-2586042 | superoxide dismutase                                                                                       | 202 |
| <i>sigA</i>     | 2600214-2601329 | RNA polymerase sigma factor RpoD                                                                           | 371 |
| <i>dnaG</i>     | 2601528-2603339 | DNA primase                                                                                                | 603 |
| <i>yqxD</i>     | 2603373-2603867 | hypothetical protein                                                                                       | 164 |
| <i>yqfL</i>     | 2604121-2604933 | hypothetical protein                                                                                       | 270 |
| <i>ccpN</i>     | 2604959-2605597 | negative regulator of gluconeogenesis                                                                      | 212 |
| <i>yqzL</i>     | 2609750-2609893 | hypothetical protein                                                                                       | 47  |
| <i>era</i>      | 2610041-2610946 | GTP-binding protein Era                                                                                    | 301 |
| <i>cdd</i>      | 2610927-2611337 | cytidine/deoxycytidine deaminase                                                                           | 136 |
| <i>phoH</i>     | 2614496-2615455 | phosphate starvation-induced protein                                                                       | 319 |
| <i>yqfD</i>     | 2615452-2616648 | stage IV sporulation protein                                                                               | 398 |

|              |                 |                                                                        |     |
|--------------|-----------------|------------------------------------------------------------------------|-----|
| <i>yqfC</i>  | 2616667-2616948 | hypothetical protein                                                   | 93  |
| <i>yqeY</i>  | 2619910-2620356 | hypothetical protein                                                   | 148 |
| <i>rpsU</i>  | 2620371-2620544 | 30S ribosomal protein S21                                              | 57  |
| <i>yqeU</i>  | 2623032-2623802 | 16S ribosomal RNA methyltransferase RsmE                               | 256 |
| <i>dnaK</i>  | 2626112-2627947 | molecular chaperone DnaK                                               | 611 |
| <i>grpE</i>  | 2627971-2628534 | heat shock protein GrpE                                                | 187 |
| <i>hrcA</i>  | 2628606-2629637 | heat-inducible transcription repressor                                 | 343 |
| <i>holA</i>  | 2636096-2637139 | DNA polymerase III subunit delta                                       | 347 |
| <i>nadD</i>  | 2643765-2644334 | nicotinic acid mononucleotide adenylyltransferase                      | 189 |
| <i>yqeI</i>  | 2644346-2644636 | RNA-binding protein                                                    | 96  |
| <i>yqeG</i>  | 2646594-2647112 | hydrolase                                                              | 172 |
| <i>levD</i>  | 2762395-2762835 | phosphotransferase system (PTS) fructose-specific enzyme IIA component | 146 |
| <i>yrzI</i>  | 2778923-2779072 | hypothetical protein                                                   | 49  |
| <i>greA</i>  | 2791494-2791967 | transcription elongation factor GreA                                   | 157 |
| <i>udk</i>   | 2792218-2792853 | uridine kinase                                                         | 211 |
| <i>yrrN</i>  | 2794147-2795076 | hydrolase                                                              | 309 |
| <i>yrrM</i>  | 2795082-2795735 | acyl-CoA O-methyltransferase                                           | 217 |
| <i>yrzB</i>  | 2797100-2797381 | hypothetical protein                                                   | 93  |
| <i>yrrK</i>  | 2797399-2797815 | Holliday junction resolvase-like protein                               | 138 |
| <i>yrzL</i>  | 2797823-2798089 | hypothetical protein                                                   | 88  |
| <i>yrzQ</i>  | 2805348-2805479 | hypothetical protein                                                   | 43  |
| <i>yrzR</i>  | 2805501-2805692 | hypothetical protein                                                   | 63  |
| <i>yrrD</i>  | 2805704-2806228 | hypothetical protein                                                   | 174 |
| <i>mnmA</i>  | 2809413-2810528 | tRNA-specific 2-thiouridylase MnmA                                     | 371 |
| <i>cymR</i>  | 2811717-2812133 | transcriptional regulator of cysteine biosynthesis                     | 138 |
| <i>yrzK</i>  | 2818191-2818361 | hypothetical protein                                                   | 56  |
| <i>yrvI</i>  | 2820077-2820475 | D-tyrosyl-tRNA(Tyr) deacylase                                          | 132 |
| <i>relA</i>  | 2820529-2822733 | GTP pyrophosphokinase                                                  | 734 |
| <i>apt</i>   | 2822901-2823413 | adenine phosphoribosyltransferase                                      | 170 |
| <i>comN</i>  | 2829152-2829448 | post-transcriptional regulator                                         | 98  |
| <i>yajC</i>  | 2832424-2832690 | preprotein translocase subunit YajC                                    | 88  |
| <i>yrzS</i>  | 2834957-2835157 | hypothetical protein                                                   | 66  |
| <i>pheB</i>  | 2852157-2852600 | hypothetical protein                                                   | 147 |
| <i>obgE</i>  | 2852661-2853947 | GTPase ObgE                                                            | 428 |
| <i>spo0B</i> | 2853981-2854559 | sporulation initiation phosphotransferase                              | 192 |
| <i>rpmA</i>  | 2854880-2855164 | 50S ribosomal protein L27                                              | 94  |
| <i>rplU</i>  | 2855518-2855826 | 50S ribosomal protein L21                                              | 102 |
| <i>minD</i>  | 2857776-2858582 | ATPase activator of MinC                                               | 268 |
| <i>minC</i>  | 2858584-2859264 | septum formation inhibitor                                             | 226 |
| <i>mreC</i>  | 2859832-2860704 | rod shape-determining protein MreC                                     | 290 |

|             |                 |                                                                        |     |
|-------------|-----------------|------------------------------------------------------------------------|-----|
| <i>mreB</i> | 2860735-2861748 | rod shape-determining protein MreB                                     | 337 |
| <i>maf</i>  | 2862572-2863141 | Maf-like protein                                                       | 189 |
| <i>hemX</i> | 2876928-2877758 | negative effector of the concentration of glutamyl-tRNA reductase HemA | 276 |
| <i>hemA</i> | 2877766-2879133 | glutamyl-tRNA reductase                                                | 455 |
| <i>clpX</i> | 2884781-2886043 | ATP-dependent protease ATP-binding subunit ClpX                        | 420 |
| <i>tig</i>  | 2886315-2887589 | trigger factor                                                         | 424 |
| <i>leuC</i> | 2889552-2890970 | isopropylmalate isomerase large subunit                                | 472 |
| <i>ysmB</i> | 2904043-2904483 | MarR family transcriptional regulator                                  | 146 |
| <i>gerE</i> | 2904727-2904951 | transcriptional regulator                                              | 74  |
| <i>sdhA</i> | 2906335-2908095 | succinate dehydrogenase flavoprotein subunit                           | 586 |
| <i>sdhC</i> | 2908129-2908737 | succinate dehydrogenase (cytochrome b558 subunit)                      | 202 |
| <i>etfB</i> | 2916378-2917151 | electron transfer flavoprotein subunit beta                            | 257 |
| <i>yshE</i> | 2920517-2920921 | hypothetical protein                                                   | 134 |
| <i>yshB</i> | 2925100-2925633 | hypothetical protein                                                   | 177 |
| <i>yshA</i> | 2925640-2925897 | cell division protein ZapA                                             | 85  |
| <i>pheS</i> | 2929438-2930472 | phenylalanyl-tRNA synthetase subunit alpha                             | 344 |
| <i>araQ</i> | 2939851-2940696 | arabinose/arabinan permease                                            | 281 |
| <i>araP</i> | 2940697-2941638 | arabinose/arabinan permease                                            | 313 |
| <i>rplT</i> | 2952224-2952583 | 50S ribosomal protein L20                                              | 119 |
| <i>rplM</i> | 2952615-2952815 | 50S ribosomal protein L35                                              | 66  |
| <i>infC</i> | 2952828-2953349 | translation initiation factor IF-3                                     | 173 |
| <i>thrS</i> | 2959257-2961188 | threonyl-tRNA synthetase                                               | 643 |
| <i>nrdR</i> | 2965681-2966139 | transcriptional regulator NrdR                                         | 152 |
| <i>speD</i> | 2966413-2966793 | S-adenosylmethionine decarboxylase                                     | 126 |
| <i>ytaF</i> | 2971531-2972163 | hypothetical protein                                                   | 210 |
| <i>phoP</i> | 2977800-2978522 | two-component response regulator                                       | 240 |
| <i>mdh</i>  | 2978734-2979672 | malate dehydrogenase                                                   | 312 |
| <i>icd</i>  | 2979716-2980987 | isocitrate dehydrogenase                                               | 423 |
| <i>citZ</i> | 2981151-2982269 | citrate synthase                                                       | 372 |
| <i>pfkA</i> | 2986588-2987547 | 6-phosphofructokinase                                                  | 319 |
| <i>accA</i> | 2987731-2988708 | acetyl-CoA carboxylase carboxyltransferase subunit alpha               | 325 |
| <i>accD</i> | 2988693-2989565 | acetyl-CoA carboxylase subunit beta                                    | 290 |
| <i>nrnA</i> | 2995908-2996849 | 3',5'-bisphosphate nucleotidase                                        | 313 |
| <i>fabG</i> | 3010661-3011428 | 3-ketoacyl-ACP reductase                                               | 255 |
| <i>argG</i> | 3013133-3014344 | argininosuccinate synthase                                             | 403 |
| <i>ackA</i> | 3015111-3016298 | acetate kinase                                                         | 395 |
| <i>tpx</i>  | 3017696-3018199 | thiol peroxidase                                                       | 167 |
| <i>ytfJ</i> | 3018309-3018764 | hypothetical protein                                                   | 151 |
| <i>sspA</i> | 3025445-3025654 | small acid-soluble spore protein                                       | 69  |
| <i>yttP</i> | 3032417-3033040 | transcriptional regulator                                              | 207 |

|              |                 |                                                                      |     |
|--------------|-----------------|----------------------------------------------------------------------|-----|
| <i>ytzK</i>  | 3038060-3038203 | hypothetical protein                                                 | 47  |
| <i>ccpA</i>  | 3044165-3045169 | Lacl family transcriptional regulator                                | 334 |
| <i>aroA</i>  | 3045445-3046521 | bifunctional 3-deoxy-7-phosphoheptulonate synthase/chorismate mutase | 358 |
| <i>ytpQ</i>  | 3053364-3054173 | hypothetical protein                                                 | 269 |
| <i>ytmP</i>  | 3060674-3061288 | kinase/phosphotransferase                                            | 204 |
| <i>yteP</i>  | 3082260-3083225 | permease                                                             | 321 |
| <i>ytcP</i>  | 3087321-3088181 | ABC transporter permease                                             | 286 |
| <i>ytwF</i>  | 3102201-3102512 | sulfur transferase                                                   | 103 |
| <i>leuS</i>  | 3102629-3105043 | leucyl-tRNA synthetase                                               | 804 |
| <i>ytvB</i>  | 3105470-3105799 | hypothetical protein                                                 | 109 |
| <i>ytrA</i>  | 3118847-3119239 | GntR family transcriptional regulator                                | 130 |
| <i>asnB</i>  | 3125777-3127675 | asparagine synthetase                                                | 632 |
| <i>metK</i>  | 3127825-3129027 | S-adenosylmethionine synthetase                                      | 400 |
| <i>ytmB</i>  | 3131152-3131394 | hypothetical protein                                                 | 80  |
| <i>ytkD</i>  | 3134983-3135459 | nucleoside triphosphate phosphohydrolase                             | 158 |
| <i>ytkC</i>  | 3135668-3136072 | autolytic amidase                                                    | 134 |
| <i>dps</i>   | 3136238-3136675 | DNA-protecting protein, ferritin                                     | 145 |
| <i>luxS</i>  | 3137495-3137968 | S-ribosylhomocysteinase                                              | 157 |
| <i>rpmE2</i> | 3138978-3139226 | 50S ribosomal protein L31                                            | 82  |
| <i>yubF</i>  | 3190462-3190725 | hypothetical protein                                                 | 87  |
| <i>yugP</i>  | 3217496-3218173 | metal-dependent protease/peptidase                                   | 225 |
| <i>yugI</i>  | 3225178-3225570 | general stress protein 13                                            | 130 |
| <i>yugG</i>  | 3226933-3227433 | Lrp/AsnC family transcriptional regulator                            | 166 |
| <i>yufK</i>  | 3236422-3236979 | hypothetical protein                                                 | 185 |
| <i>comA</i>  | 3252804-3253448 | two-component response regulator                                     | 214 |
| <i>degQ</i>  | 3257092-3257232 | pleiotropic regulator                                                | 46  |
| <i>pncA</i>  | 3260891-3261442 | nicotinamidase                                                       | 183 |
| <i>yuzF</i>  | 3264265-3264501 | hypothetical protein                                                 | 78  |
| <i>yukD</i>  | 3275832-3276071 | bacteriocin                                                          | 79  |
| <i>yukE</i>  | 3276141-3276434 | hypothetical protein                                                 | 97  |
| <i>ybdZ</i>  | 3280294-3280503 | hypothetical protein                                                 | 69  |
| <i>yuiB</i>  | 3299344-3299664 | hypothetical protein                                                 | 106 |
| <i>yuiA</i>  | 3299718-3299861 | hypothetical protein                                                 | 47  |
| <i>yuzB</i>  | 3308368-3308604 | hypothetical protein                                                 | 78  |
| <i>yuzD</i>  | 3309960-3310286 | sulfur oxido-reduction management enzyme                             | 108 |
| <i>yutD</i>  | 3319286-3319561 | hypothetical protein                                                 | 91  |
| <i>lipA</i>  | 3320324-3321220 | lipoyl synthase                                                      | 298 |
| <i>yunB</i>  | 3322463-3323227 | spore formation protein                                              | 254 |
| <i>yunF</i>  | 3325917-3326765 | hypothetical protein                                                 | 282 |
| <i>frlM</i>  | 3347919-3348821 | fructose-amino acid permease                                         | 300 |

|             |                 |                                                           |     |
|-------------|-----------------|-----------------------------------------------------------|-----|
| <i>frlN</i> | 3348825-3349703 | fructose-amino acid permease                              | 292 |
| <i>frlB</i> | 3351110-3352096 | fructoselysine-6-P-deglycase                              | 328 |
| <i>sufB</i> | 3355593-3356990 | FeS cluster formation protein                             | 465 |
| <i>iscU</i> | 3357011-3357454 | iron-sulfur cluster assembly scaffold protein             | 147 |
| <i>sufS</i> | 3357444-3358664 | cysteine desulfurase                                      | 406 |
| <i>sufD</i> | 3358664-3359977 | FeS assembly protein SufD                                 | 437 |
| <i>sufC</i> | 3359995-3360780 | sulfur mobilizing ABC protein, ATPase                     | 261 |
| <i>metN</i> | 3361767-3362591 | methionine ABC transporter, substrate binding lipoprotein | 274 |
| <i>metQ</i> | 3363266-3364291 | methionine ABC transporter ATP-binding protein            | 341 |
| <i>yusG</i> | 3365831-3366067 | hypothetical protein                                      | 78  |
| <i>yusH</i> | 3366123-3366506 | glycine cleavage system protein H                         | 127 |
| <i>yusI</i> | 3366573-3366929 | oxidoreductase                                            | 118 |
| <i>yusU</i> | 3378800-3379087 | hypothetical protein                                      | 95  |
| <i>yusV</i> | 3379112-3379939 | iron(III)-siderophore transporter ATP binding protein     | 275 |
| <i>yuzO</i> | 3387781-3387945 | hypothetical protein                                      | 54  |
| <i>fumC</i> | 3389024-3390412 | fumarate hydratase                                        | 462 |
| <i>yvzF</i> | 3390479-3390664 | hypothetical protein                                      | 61  |
| <i>sspJ</i> | 3421465-3421605 | small acid-soluble spore protein                          | 46  |
| <i>yvaG</i> | 3449732-3450526 | oxidoreductase                                            | 264 |
| <i>smpB</i> | 3451248-3451718 | SsrA-binding protein                                      | 156 |
| <i>rnr</i>  | 3451863-3454202 | ribonuclease R                                            | 779 |
| <i>yvaK</i> | 3454221-3454967 | carboxylesterase                                          | 248 |
| <i>secG</i> | 3455093-3455323 | preprotein translocase subunit SecG                       | 76  |
| <i>yvzC</i> | 3456282-3456515 | transcriptional regulator                                 | 77  |
| <i>eno</i>  | 3476555-3477847 | phosphopyruvate hydratase                                 | 430 |
| <i>pgm</i>  | 3477877-3479412 | phosphoglyceromutase                                      | 511 |
| <i>tpiA</i> | 3479405-3480166 | triosephosphate isomerase                                 | 253 |
| <i>pgk</i>  | 3480197-3481381 | phosphoglycerate kinase                                   | 394 |
| <i>gapA</i> | 3481698-3482705 | glyceraldehyde-3-phosphate dehydrogenase                  | 335 |
| <i>cggR</i> | 3482752-3483774 | transcriptional regulator of <i>gapA</i>                  | 340 |
| <i>epsB</i> | 3528462-3529145 | protein tyrosine kinase                                   | 227 |
| <i>epsA</i> | 3529151-3529855 | modulator of protein tyrosine kinase EpsB                 | 234 |
| <i>padC</i> | 3532325-3532810 | phenolic acid decarboxylase                               | 161 |
| <i>crh</i>  | 3569292-3569549 | phosphocarrier protein Chr                                | 85  |
| <i>whiA</i> | 3569573-3570523 | morphogen                                                 | 316 |
| <i>yvcK</i> | 3570546-3571499 | gluconeogenesis factor                                    | 317 |
| <i>csbA</i> | 3615116-3615346 | hypothetical protein                                      | 76  |
| <i>ftsX</i> | 3623938-3624828 | cell-division ABC transporter                             | 296 |
| <i>ftsE</i> | 3624821-3625507 | cell-division ABC transporter ATP-binding protein         | 228 |
| <i>yvyD</i> | 3631003-3631572 | ribosome-associated sigma 54 modulation protein           | 189 |

|                |                 |                                                                 |     |
|----------------|-----------------|-----------------------------------------------------------------|-----|
| <i>csrA</i>    | 3636046-3636270 | carbon storage regulator                                        | 74  |
| <i>yviF</i>    | 3636264-3636695 | flagellar assembly protein FliW                                 | 143 |
| <i>flgM</i>    | 3640285-3640551 | anti-sigma factor repressor of sigma(D)-dependent transcription | 88  |
| <i>degU</i>    | 3644607-3645296 | two-component response regulator                                | 229 |
| <i>degS</i>    | 3645379-3646536 | two-component sensor histidine kinase                           | 385 |
| <i>pgsC</i>    | 3698982-3699431 | capsular polyglutamate amide ligase/translocase subunit         | 149 |
| <i>pgsB</i>    | 3699446-3700627 | capsular polyglutamate synthetase                               | 393 |
| <i>alsD</i>    | 3708799-3709566 | alpha-acetolactate decarboxylase                                | 255 |
| <i>ywzD</i>    | 3733505-3733648 | hypothetical protein                                            | 47  |
| <i>ssbB</i>    | 3740206-3740547 | single-strand DNA-binding protein                               | 113 |
| <i>mbl</i>     | 3747254-3748255 | rod shape-determining protein Mbl                               | 333 |
| <i>spoIIID</i> | 3748421-3748702 | transcriptional regulator                                       | 93  |
| <i>usd</i>     | 3748717-3748827 | required for translation of spoIIID                             | 36  |
| <i>murAA</i>   | 3777949-3779259 | UDP-N-acetylglucosamine 1-carboxyvinyltransferase               | 436 |
| <i>ywmB</i>    | 3779293-3780033 | hypothetical protein                                            | 246 |
| <i>atpC</i>    | 3781069-3781467 | ATP synthase F0F1 subunit epsilon                               | 132 |
| <i>atpD</i>    | 3781491-3782912 | ATP synthase F0F1 subunit beta                                  | 473 |
| <i>atpG</i>    | 3782938-3783801 | ATP synthase F0F1 subunit gamma                                 | 287 |
| <i>atpA</i>    | 3783878-3785386 | ATP synthase F0F1 subunit alpha                                 | 502 |
| <i>atpH</i>    | 3785403-3785948 | ATP synthase F0F1 subunit delta                                 | 181 |
| <i>atpF</i>    | 3785945-3786457 | ATP synthase F0F1 subunit B                                     | 170 |
| <i>atpE</i>    | 3786620-3786832 | ATP synthase F0F1 subunit C                                     | 70  |
| <i>atpB</i>    | 3786878-3787612 | ATP synthase F0F1 subunit A                                     | 244 |
| <i>atpI</i>    | 3787620-3788003 | ATP synthase subunit i                                          | 127 |
| <i>glyA</i>    | 3789190-3790437 | serine hydroxymethyltransferase                                 | 415 |
| <i>prfA</i>    | 3797085-3798155 | peptide chain release factor 1                                  | 356 |
| <i>rpmE</i>    | 3803081-3803281 | 50S ribosomal protein L31                                       | 66  |
| <i>rho</i>     | 3803400-3804683 | transcription termination factor Rho                            | 427 |
| <i>murAB</i>   | 3806086-3807375 | UDP-N-acetylglucosamine 1-carboxyvinyltransferase               | 429 |
| <i>ywjH</i>    | 3807754-3808392 | transaldolase                                                   | 212 |
| <i>fbaA</i>    | 3808512-3809369 | fructose-bisphosphate aldolase                                  | 285 |
| <i>ywiB</i>    | 3835317-3835745 | hypothetical protein                                            | 142 |
| <i>ywgA</i>    | 3858999-3859499 | hypothetical protein                                            | 166 |
| <i>ywfO</i>    | 3859535-3860836 | metal-dependent phosphohydrolase                                | 433 |
| <i>ywzC</i>    | 3860998-3861222 | hypothetical protein                                            | 74  |
| <i>eutD</i>    | 3865355-3866326 | phosphotransacetylase                                           | 323 |
| <i>spsA</i>    | 3892351-3893121 | spore coat dTDP-glycosyltransferase                             | 256 |
| <i>ywcl</i>    | 3907012-3907314 | hypothetical protein                                            | 100 |



|                |                 |                                                                        |     |
|----------------|-----------------|------------------------------------------------------------------------|-----|
| <i>qoxD</i>    | 3914315-3914689 | cytochrome aa3-600 quinol oxidase subunit IV                           | 124 |
| <i>qoxC</i>    | 3914691-3915305 | cytochrome aa3-600 quinol oxidase subunit III                          | 204 |
| <i>qoxB</i>    | 3915319-3917268 | cytochrome aa3-600 quinol oxidase subunit I                            | 649 |
| <i>qoxA</i>    | 3917296-3918261 | cytochrome aa3-600 quinol oxidase subunit II                           | 321 |
| <i>menA</i>    | 3950726-3951661 | 1,4-dihydroxy-2-naphthoate octaprenyltransferase                       | 311 |
| <i>licB</i>    | 3961566-3961874 | phosphotransferase system (PTS) lichenan-specific enzyme IIB component | 102 |
| <i>cydB</i>    | 3976791-3977807 | cytochrome bd ubiquinol oxidase subunit II                             | 338 |
| <i>yxzJ</i>    | 4019005-4019136 | hypothetical protein                                                   | 43  |
| <i>yxEO</i>    | 4058029-4058778 | ABC transporter ATP-binding protein                                    | 249 |
| <i>yxEN</i>    | 4058791-4059465 | ABC transporter permease                                               | 224 |
| <i>yxEH</i>    | 4063684-4064496 | hydrolase                                                              | 270 |
| <i>yxEC</i>    | 4066607-4067005 | hypothetical protein                                                   | 132 |
| <i>yxEA</i>    | 4068189-4068536 | hypothetical protein                                                   | 115 |
| <i>yxDM</i>    | 4068550-4070418 | cationic peptides ABC transporter permease                             | 622 |
| <i>iolJ</i>    | 4073081-4073953 | 2-deoxy-5-keto-D-gluconic acid 6-phosphate aldolase                    | 290 |
| <i>iolH</i>    | 4074896-4075765 | sugar-phosphate epimerase/isomerase                                    | 289 |
| <i>iolC</i>    | 4081029-4082006 | 2-deoxy-5-keto-D-gluconic acid kinase                                  | 325 |
| <i>yxAF</i>    | 4107352-4107927 | transcriptional regulator                                              | 191 |
| <i>yyzF</i>    | 4134996-4135166 | hypothetical protein                                                   | 56  |
| <i>walR</i>    | 4153696-4154403 | two-component response regulator YycG                                  | 235 |
| <i>purA</i>    | 4155433-4156725 | adenylosuccinate synthetase                                            | 430 |
| <i>dnaC</i>    | 4157471-4158835 | replicative DNA helicase                                               | 454 |
| <i>yybT</i>    | 4163643-4165622 | phosphodiesterase                                                      | 659 |
| <i>yybS</i>    | 4165659-4166588 | hypothetical protein                                                   | 309 |
| <i>yyzH</i>    | 4166815-4166964 | hypothetical protein                                                   | 49  |
| <i>rpsR</i>    | 4198603-4198842 | 30S ribosomal protein S18                                              | 79  |
| <i>ssbA</i>    | 4198886-4199404 | single-strand DNA-binding protein                                      | 172 |
| <i>rpsF</i>    | 4199445-4199732 | 30S ribosomal protein S6                                               | 95  |
| <i>yyzM</i>    | 4203124-4203330 | hypothetical protein                                                   | 68  |
| <i>noc</i>     | 4207897-4208748 | DNA-binding protein Spo0J-like                                         | 283 |
| <i>gidB</i>    | 4208870-4209589 | 16S rRNA methyltransferase GidB                                        | 239 |
| <i>gidA</i>    | 4209603-4211489 | tRNA uridine 5-carboxymethylaminomethyl modification protein GidA      | 628 |
| <i>trmE</i>    | 4211510-4212889 | tRNA modification GTPase TrmE                                          | 459 |
| <i>spoIIIJ</i> | 4213823-4214608 | OxaA-like protein precursor                                            | 261 |
| <i>rnpA</i>    | 4214753-4215103 | ribonuclease P                                                         | 116 |
| <i>rpmH</i>    | 4215255-4215389 | 50S ribosomal protein L34                                              | 44  |
|                |                 |                                                                        |     |

| <b>Lagging strand genes</b> |                   |                                                      |                    |
|-----------------------------|-------------------|------------------------------------------------------|--------------------|
| <b>Name</b>                 | <b>CDS-region</b> | <b>Product</b>                                       | <b>Length (AA)</b> |
| <i>abrB</i>                 | 44848-45138       | transcriptional regulator for transition state genes | 96                 |
| <i>gerD</i>                 | 158515-159072     | lipoprotein                                          | 185                |
| <i>ycbP</i>                 | 281769-282155     | inner integral membrane protein                      | 128                |
| <i>ycgQ</i>                 | 349996-350853     | hypothetical protein                                 | 285                |
| <i>nasE</i>                 | 355412-355732     | assimilatory nitrite reductase subunit               | 106                |
| <i>tcyC</i>                 | 409208-409951     | cystine ABC transporter ATP-binding protein          | 247                |
| <i>tcyB</i>                 | 409965-410669     | cystine ABC transporter permease                     | 234                |
| <i>ycnC</i>                 | 437474-438352     | TetR family transcriptional regulator                | 292                |
| <i>ycnE</i>                 | 439282-439569     | hypothetical protein                                 | 95                 |
| <i>yczJ</i>                 | 463496-463783     | hypothetical protein                                 | 95                 |
| <i>ydbN</i>                 | 506322-506501     | hypothetical protein                                 | 59                 |
| <i>ydbP</i>                 | 507753-508073     | thioredoxin                                          | 106                |
| <i>ydgJ</i>                 | 612836-613330     | MarR family transcriptional regulator                | 164                |
| <i>pbuE</i>                 | 625125-626291     | hypoxanthine efflux transporter                      | 388                |
| <i>ydiK</i>                 | 648742-648933     | hypothetical protein                                 | 63                 |
| <i>yflI</i>                 | 839077-839232     | hypothetical protein                                 | 51                 |
| <i>yflG</i>                 | 839735-840484     | methionine aminopeptidase                            | 249                |
| <i>yflE</i>                 | 842047-843996     | exported enzyme and anion transporter                | 649                |
| <i>sspK</i>                 | 928112-928264     | acid-soluble spore protein K                         | 50                 |
| <i>yfhP</i>                 | 934457-935440     | membrane hydrolase                                   | 327                |
| <i>yfhS</i>                 | 936773-936997     | hypothetical protein                                 | 74                 |
| <i>ygaE</i>                 | 941168-942229     | hypothetical protein                                 | 353                |
| <i>katA</i>                 | 959535-960986     | vegetative catalase 1                                | 483                |
| <i>ygzD</i>                 | 966671-966871     | HTH-type transcriptional regulator                   | 66                 |
| <i>yhdK</i>                 | 1028233-1028523   | negative regulator of the activity of sigma-M        | 96                 |
| <i>sigM</i>                 | 1029577-1030068   | RNA polymerase sigma factor SigM                     | 163                |
| <i>yhdP</i>                 | 1032063-1033397   | transporter or sensor                                | 444                |
| <i>cueR</i>                 | 1033458-1033889   | copper efflux transcriptional regulator              | 143                |
| <i>sspB</i>                 | 1050031-1050234   | small acid-soluble spore protein                     | 67                 |
| <i>yheE</i>                 | 1050443-1050661   | hypothetical protein                                 | 72                 |
| <i>hpr</i>                  | 1073106-1073717   | transcriptional regulator Hpr                        | 203                |
| <i>yhaH</i>                 | 1073895-1074251   | hypothetical protein                                 | 118                |
| <i>yhfH</i>                 | 1098120-1098260   | hypothetical protein                                 | 46                 |
| <i>yhzC</i>                 | 1116583-1116816   | hypothetical protein                                 | 77                 |
| <i>yhjC</i>                 | 1120628-1120828   | hypothetical protein                                 | 66                 |
| <i>ntdC</i>                 | 1126400-1127452   | neotrehalosdiamine biosynthesis dehydrogenase        | 350                |
| <i>gerPF</i>                | 1148494-1148721   | spore germination protein                            | 75                 |
| <i>yjzD</i>                 | 1204731-1204916   | hypothetical protein                                 | 61                 |

|                |                 |                                                                  |     |
|----------------|-----------------|------------------------------------------------------------------|-----|
| <i>yjbI</i>    | 1234510-1234908 | thiol management oxidoreductase component                        | 132 |
| <i>yjoA</i>    | 1313840-1314304 | hypothetical protein                                             | 154 |
| <i>spoIISB</i> | 1348442-1348612 | two-component apoptotic control system component<br>B            | 56  |
| <i>tnrA</i>    | 1397411-1397743 | nitrogen sensing transcriptional regulator                       | 110 |
| <i>sspD</i>    | 1413800-1413994 | small acid-soluble spore protein                                 | 64  |
| <i>motB</i>    | 1433676-1434461 | flagellar motor protein MotB                                     | 261 |
| <i>ykvS</i>    | 1447662-1447847 | hypothetical protein                                             | 61  |
| <i>ykzT</i>    | 1473240-1473401 | hypothetical protein                                             | 53  |
| <i>ykyB</i>    | 1474560-1475024 | hypothetical protein                                             | 154 |
| <i>ykpC</i>    | 1516339-1516473 | hypothetical protein                                             | 44  |
| <i>ykzG</i>    | 1524791-1525000 | hypothetical protein                                             | 69  |
| <i>def</i>     | 1526195-1526749 | peptide deformylase                                              | 184 |
| <i>slp</i>     | 1533327-1533701 | small peptidoglycan-associated lipoprotein                       | 124 |
| <i>ylaF</i>    | 1545820-1546008 | hypothetical protein                                             | 62  |
| <i>ylaI</i>    | 1548389-1548598 | hypothetical protein                                             | 69  |
| <i>lexA</i>    | 1917639-1918256 | LexA repressor                                                   | 205 |
| <i>ynzD</i>    | 1922841-1923014 | Spo0A-P phosphatase                                              | 57  |
| <i>cotM</i>    | 1925655-1926047 | spore coat protein                                               | 130 |
| <i>sspO</i>    | 1926306-1926452 | acid-soluble spore protein O                                     | 48  |
| <i>yoeD</i>    | 2004262-2004492 | excisionase                                                      | 76  |
| <i>yocA</i>    | 2085303-2085980 | transposon-related lytic enzyme                                  | 225 |
| <i>yodC</i>    | 2127813-2128421 | oxidoreductase                                                   | 202 |
| <i>yoyF</i>    | 2137897-2138040 | hypothetical protein                                             | 47  |
| <i>ypoP</i>    | 2288194-2288619 | MarR family transcriptional regulator                            | 141 |
| <i>metA</i>    | 2305378-2306283 | homoserine O-succinyltransferase                                 | 301 |
| <i>cspD</i>    | 2307905-2308105 | cold-shock protein                                               | 66  |
| <i>ypdP</i>    | 2309730-2310419 | hypothetical protein                                             | 229 |
| <i>sspL</i>    | 2310859-2310987 | small acid-soluble spore protein                                 | 42  |
| <i>ypzG</i>    | 2329870-2330022 | hypothetical protein                                             | 50  |
| <i>yppF</i>    | 2338582-2338770 | site-specific integrase                                          | 62  |
| <i>sspM</i>    | 2339670-2339774 | small acid-soluble spore protein                                 | 34  |
| <i>recU</i>    | 2340802-2341422 | Holliday junction-specific endonuclease                          | 206 |
| <i>ypzI</i>    | 2393422-2393559 | hypothetical protein                                             | 45  |
| <i>fer</i>     | 2409729-2409977 | ferredoxin                                                       | 82  |
| <i>yqzJ</i>    | 2483586-2483873 | hypothetical protein                                             | 95  |
| <i>yqhP</i>    | 2542047-2542442 | hypothetical protein                                             | 131 |
| <i>sinI</i>    | 2552446-2552619 | antagonist of SinR                                               | 57  |
| <i>sinR</i>    | 2552653-2552988 | transcriptional regulator for post-exponential-phase<br>response | 111 |
| <i>yqgY</i>    | 2564638-2564883 | hypothetical protein                                             | 81  |
| <i>yqzD</i>    | 2576367-2576720 | hypothetical protein                                             | 117 |

|             |                 |                                                                            |     |
|-------------|-----------------|----------------------------------------------------------------------------|-----|
| <i>ispG</i> | 2589123-2590256 | 4-hydroxy-3-methylbut-2-en-1-yl diphosphate synthase                       | 377 |
| <i>antE</i> | 2602979-2603275 | hypothetical protein                                                       | 98  |
| <i>rpsT</i> | 2635815-2636081 | 30S ribosomal protein S20                                                  | 88  |
| <i>yqzM</i> | 2637369-2637503 | hypothetical protein                                                       | 44  |
| <i>sda</i>  | 2647456-2647614 | chemotaxis protein CheC                                                    | 52  |
| <i>sigV</i> | 2769850-2770350 | RNA polymerase ECF(extracytoplasmic function)-type sigma factor (sigma(V)) | 166 |
| <i>yrzA</i> | 2788680-2788883 | hypothetical protein                                                       | 67  |
| <i>yslB</i> | 2909030-2909476 | hypothetical protein                                                       | 148 |
| <i>sspI</i> | 2931692-2931907 | small acid-soluble spore protein SspI                                      | 71  |
| <i>ysdB</i> | 2951490-2951882 | hypothetical protein                                                       | 130 |
| <i>ytrI</i> | 2995067-2995597 | sporulation protein                                                        | 176 |
| <i>ytzJ</i> | 2995699-2995890 | hypothetical protein                                                       | 63  |
| <i>ytpI</i> | 2996980-2997282 | hypothetical protein                                                       | 100 |
| <i>rpsD</i> | 3035730-3036332 | 30S ribosomal protein S4                                                   | 200 |
| <i>acuA</i> | 3040092-3040724 | protein acetyltransferase                                                  | 210 |
| <i>acuB</i> | 3040751-3041395 | acetoin degradation regulation pathway protein                             | 214 |
| <i>ytzH</i> | 3060395-3060673 | hypothetical protein                                                       | 92  |
| <i>ytzE</i> | 3072401-3072622 | DeoR family transcriptional regulator                                      | 73  |
| <i>ytzL</i> | 3141900-3142058 | hypothetical protein                                                       | 52  |
| <i>yuzA</i> | 3224864-3225100 | hypothetical protein                                                       | 78  |
| <i>yuxJ</i> | 3232640-3233818 | exporter                                                                   | 392 |
| <i>mrpB</i> | 3248996-3249427 | monovalent cation/H <sup>+</sup> antiporter subunit B                      | 143 |
| <i>mrpC</i> | 3249427-3249768 | monovalent cation/H <sup>+</sup> antiporter subunit C                      | 113 |
| <i>mrpF</i> | 3251724-3252008 | monovalent cation/H <sup>+</sup> antiporter subunit F                      | 94  |
| <i>yutJ</i> | 3308867-3309934 | NADH dehydrogenase                                                         | 355 |
| <i>yutI</i> | 3310386-3310721 | (Fe-S)-binding protein                                                     | 111 |
| <i>yutG</i> | 3317502-3318002 | phosphatidylglycerophosphatase A                                           | 166 |
| <i>yuzL</i> | 3372569-3372715 | hypothetical protein                                                       | 48  |
| <i>yuzM</i> | 3373743-3373988 | hypothetical protein                                                       | 81  |
| <i>yusN</i> | 3374001-3374333 | hypothetical protein                                                       | 110 |
| <i>mrgA</i> | 3383565-3384026 | metalloregulation DNA-binding stress protein                               | 153 |
| <i>yuxN</i> | 3388113-3388988 | transcriptional regulator                                                  | 291 |
| <i>yvfG</i> | 3513887-3514105 | hypothetical protein                                                       | 72  |
| <i>sacB</i> | 3536012-3537433 | levansucrase                                                               | 473 |
| <i>clpP</i> | 3546234-3546827 | ATP-dependent Clp protease proteolytic subunit                             | 197 |
| <i>yvdC</i> | 3559632-3559952 | pyrophosphohydrolase                                                       | 106 |
| <i>ywpF</i> | 3741182-3741592 | hypothetical protein                                                       | 136 |
| <i>ywoH</i> | 3749052-3749465 | MarR family transcriptional regulator                                      | 137 |
| <i>sboA</i> | 3836058-3836189 | subtilosin A                                                               | 43  |
| <i>albB</i> | 3837682-3837843 | hypothetical protein                                                       | 53  |

|             |                 |                                                                 |     |
|-------------|-----------------|-----------------------------------------------------------------|-----|
| <i>ywhB</i> | 3853486-3853674 | 4-oxalocrotonate tautomerase                                    | 62  |
| <i>thiD</i> | 3900963-3901778 | pyridoxal kinase                                                | 271 |
| <i>ywcE</i> | 3914009-3914272 | protein required for proper spore morphogenesis and germination | 87  |
| <i>ywbH</i> | 3933209-3933595 | holin-like protein                                              | 128 |
| <i>lrgB</i> | 3933577-3934254 | anti-holin factor controlling activity of murein hydrolases     | 225 |
| <i>sacY</i> | 3943667-3944509 | transcriptional antiterminator                                  | 280 |
| <i>ywzH</i> | 3952108-3952257 | hypothetical protein                                            | 49  |
| <i>dltB</i> | 3953783-3954970 | D-alanine esterase for lipoteichoic acid and wall teichoic acid | 395 |
| <i>dltC</i> | 3954987-3955223 | D-alanine--poly(phosphoribitol) ligase subunit 2                | 78  |
| <i>ywaA</i> | 3957391-3958482 | branched-chain amino acid aminotransferase                      | 363 |
| <i>yxjG</i> | 3999350-4000486 | methyltetrahydrofolate methyltransferase                        | 378 |
| <i>yxjD</i> | 4066210-4066563 | hypothetical protein                                            | 117 |
| <i>ahpC</i> | 4118950-4119513 | alkyl hydroperoxide reductase                                   | 187 |
| <i>ahpF</i> | 4119527-4121056 | alkyl hydroperoxide reductase                                   | 509 |

**Supplementary Table 2.** List of core *Bacillus subtilis* genes analyzed on both leading and lagging strand. Essential genes are highlighted in gray.

| <b>Strand</b> |                    | <b># of Genes</b> | <b>Mean Pi</b> | <b>Mean dS</b> | <b>Mean dN</b> |
|---------------|--------------------|-------------------|----------------|----------------|----------------|
| <b>Lead</b>   | Mean               | 2086              | 0.017082       | 0.060589       | 0.00549        |
|               | Standard deviation |                   | 0.008668       | 0.036492       | 0.005119       |
|               | Standard error     |                   | 0.00019        | 0.000799       | 0.000112       |
|               |                    |                   |                |                |                |
| <b>Lag</b>    | Mean               | 856               | 0.017353       | 0.058889       | 0.006205       |
|               | Standard deviation |                   | 0.008729       | 0.034128       | 0.005741       |
|               | Standard error     |                   | 0.000298       | 0.001166       | 0.000196       |
|               |                    |                   |                |                |                |
| z value       |                    |                   | 0.7668         | 1.202696       | 3.16732        |
| p value       |                    |                   | 0.4432         | 0.2291         | 0.0015         |

**Supplementary Table 3.** The mean values for all, non-core, genes in relation to diversity are presented. This analysis included the genes of leading and lagging strands which are mosaic in nature, i.e. at least present in two strains but not in all five (we used *B. subtilis* subsp. *subtilis* str. 168 as the reference genome and extracted homologs from other 4 strains with nucleotide sequence identity and length coverage values of  $\geq 95\%$ ). The  $\pi$  (Pi), dS and dN values are listed for the leading and lagging strands. A statistically significant difference in dN between the two strands is detected with a  $p < 0.005$ . Analysis of statistical significance was performed using the z-test for  $\pi$ , dS and dN values (see methods).

**List of 34 leading strand genes under positive selection**

| <b>Name</b>     | <b>CDS-region</b> | <b>Product</b>                                             | <b>Length (AA)</b> |
|-----------------|-------------------|------------------------------------------------------------|--------------------|
| <i>spoIIIAF</i> | 2533695-2534312   | stage III sporulation protein                              | 206                |
| <i>yabQ</i>     | 68515-69147       | membrane protein of the forespore                          | 211                |
| <i>yesY</i>     | 774138-774788     | rhamnogalacturonan acetyltransferase                       | 217                |
| <i>epsB</i>     | 3528465-3529145   | protein tyrosine kinase                                    | 227                |
| <i>ywmB</i>     | 3779296-3780033   | hypothetical protein                                       | 246                |
| <i>ylmH</i>     | 1611654-1612424   | factor involved in shape determination, RNA-binding fold   | 257                |
| <i>sumT</i>     | 1634061-1634831   | uroporphyrinogen III and precorrin-1C-methyltransferase    | 257                |
| <i>uppS</i>     | 1721214-1721993   | undecaprenyl pyrophosphate synthase                        | 260                |
| <i>xkdF</i>     | 1328702-1329526   | hypothetical protein                                       | 275                |
| <i>yloC</i>     | 1640720-1641592   | hypothetical protein                                       | 291                |
| <i>spoVFA</i>   | 1744367-1745257   | dipicolinate synthase subunit A                            | 297                |
| <i>yybS</i>     | 4165662-4166588   | hypothetical protein                                       | 309                |
| <i>nrnA</i>     | 2995911-2996849   | 3',5'-bisphosphate nucleotidase                            | 313                |
| <i>yteP</i>     | 3082263-3083225   | permease                                                   | 321                |
| <i>eutD</i>     | 3865358-3866326   | phosphotransacetylase                                      | 323                |
| <i>frlB</i>     | 3351113-3352096   | fructoselysine-6-P-deglycase                               | 328                |
| <i>yhjM</i>     | 1129715-1130701   | transcriptional regulator of the ntd operon; (LacI family) | 329                |
| <i>yblL</i>     | 1572765-1573787   | degradative enzyme                                         | 341                |
| <i>holA</i>     | 2636099-2637139   | DNA polymerase III subunit delta                           | 347                |
| <i>dxr</i>      | 1722871-1724019   | 1-deoxy-D-xylulose 5-phosphate reductoisomerase            | 383                |
| <i>rseP</i>     | 1724029-1725294   | inner membrane zinc metalloprotease                        | 422                |
| <i>yabE</i>     | 48629-49939       | cell wall shaping enzyme                                   | 437                |
| <i>sufD</i>     | 3358667-3359977   | FeS assembly protein SufD                                  | 437                |
| <i>dacA</i>     | 17534-18862       | D-alanyl-D-alanine carboxypeptidase                        | 443                |
| <i>xylA</i>     | 1891908-1893242   | xylose isomerase                                           | 445                |
| <i>hemA</i>     | 2877769-2879133   | glutamyl-tRNA reductase                                    | 455                |
| <i>tilS</i>     | 74929-76344       | tRNA <sup>Ile</sup> lysidine synthetase                    | 472                |
| <i>leuC</i>     | 2889555-2890970   | isopropylmalate isomerase large subunit                    | 472                |
| <i>atpA</i>     | 3783881-3785386   | ATP synthase F0F1 subunit alpha                            | 502                |
| <i>guaA</i>     | 692740-694278     | GMP synthase                                               | 513                |
| <i>yxdM</i>     | 4068553-4070418   | cationic peptides ABC transporter permease                 | 622                |
| <i>asnB</i>     | 3125780-3127675   | asparagine synthetase                                      | 632                |
| <i>infB</i>     | 1734009-1736156   | translation initiation factor IF-2                         | 716                |
| <i>leuS</i>     | 3102632-3105043   | leucyl-tRNA synthetase                                     | 804                |

| List of 8 lagging strand genes under positive selection |                 |                                                                 |             |
|---------------------------------------------------------|-----------------|-----------------------------------------------------------------|-------------|
| Name                                                    | CDS-region      | Product                                                         | Length (AA) |
| <i>yodC</i>                                             | 2127813-2128418 | oxidoreductase                                                  | 202         |
| <i>lrgB</i>                                             | 3933577-3934251 | anti-holin factor controlling activity of mureinhydrolases      | 225         |
| <i>ycgQ</i>                                             | 349999-350853   | hypothetical protein                                            | 285         |
| <i>ycnC</i>                                             | 437477-438352   | TetR family transcriptional regulator                           | 292         |
| <i>ntdC</i>                                             | 1126403-1127452 | neotrehalosadiamine biosynthesis dehydrogenase                  | 350         |
| <i>yuxJ</i>                                             | 3232640-3233815 | exporter                                                        | 392         |
| <i>dltB</i>                                             | 3953783-3954967 | D-alanine esterase for lipoteichoic acid and wall teichoic acid | 395         |
| <i>sacB</i>                                             | 3536012-3537430 | levansucrase                                                    | 473         |

**Supplementary Table 4.** List of core *Bacillus subtilis* genes identified to have convergent amino acid mutations (i.e. repeated phylogenetic changes at same amino acid positions).

| Strand      | Lower part of dN |                              | Higher part of dN |                              |
|-------------|------------------|------------------------------|-------------------|------------------------------|
|             | Median dN        | Median transformed Log Ratio | Median dN         | Median transformed Log Ratio |
| <b>Lead</b> | 0.00133          | 1.23310                      | 1.03039           | 1.03039                      |
| <b>Lag</b>  | 0.00296          | 0.78541                      | 0.00701           | 2.35645                      |

**Supplementary Table 5.** Comparison of gene expression median values to dN. The transformed Log Ratio value is 3 times higher for high dN genes than low dN genes, whereas for leading strand the Log Ratio value for high dN genes are smaller or nearly equal to the low dN genes.



| <u>IPTG+</u>   |         |            |         | <u>No IPTG</u> |         |            |         |
|----------------|---------|------------|---------|----------------|---------|------------|---------|
| Co-directional |         | Head-On    |         | Co-Directional |         | Head-On    |         |
| Revertants     | Cells   | Revertants | Cells   | Revertants     | Cells   | Revertants | Cells   |
| 5              | 7.5E+07 | 7          | 6.8E+08 | 1              | 2.7E+08 | 0          | 2.6E+08 |
| 6              | 8.1E+08 | 10         | 3.5E+08 | 1              | 5.3E+08 | 0          | 2.7E+08 |
| 6              | 1.4E+08 | 10         | 3.2E+08 | 1              | 2.6E+08 | 0          | 6.0E+08 |
| 6              | 7.5E+07 | 11         | 4.5E+08 | 1              | 3.3E+08 | 1          | 3.8E+08 |
| 6              | 9.0E+07 | 12         | 3.2E+08 | 1              | 5.3E+08 | 1          | 3.9E+08 |
| 7              | 4.7E+08 | 12         | 2.1E+08 | 1              | 2.4E+08 | 1          | 2.4E+08 |
| 7              | 1.5E+08 | 13         | 3.8E+08 | 2              | 3.0E+08 | 1          | 3.6E+08 |
| 7              | 2.4E+08 | 14         | 1.5E+08 | 2              | 4.8E+08 | 1          | 4.5E+08 |
| 9              | 1.2E+08 | 14         | 1.1E+08 | 2              | 1.2E+08 | 1          | 1.8E+08 |
| 9              | 6.0E+07 | 15         | 1.4E+08 | 2              | 2.1E+08 | 1          | 5.7E+08 |
| 9              | 5.0E+08 | 16         | 2.7E+08 | 2              | 2.1E+08 | 1          | 6.9E+08 |
| 10             | 1.4E+08 | 18         | 3.0E+08 | 2              | 1.2E+08 | 1          | 3.8E+08 |
| 10             | 3.0E+07 | 20         | 1.4E+08 | 2              | 4.4E+08 | 2          | 4.2E+08 |
| 10             | 7.5E+07 | 25         | 1.5E+08 | 2              | 2.3E+08 | 2          | 3.2E+08 |
| 10             | 1.5E+08 | 25         | 2.6E+08 | 2              | 5.1E+08 | 2          | 3.5E+08 |
| 12             | 6.2E+08 | 29         | 4.4E+08 | 2              | 4.1E+08 | 2          | 5.7E+08 |
| 13             | 8.0E+08 | 29         | 7.7E+08 | 3              | 1.8E+08 | 3          | 5.4E+08 |
| 13             | 3.5E+09 | 31         | 3.3E+08 | 3              | 4.7E+08 | 3          | 1.5E+08 |
| 13             | 3.9E+08 | 35         | 2.9E+08 | 3              | 3.6E+08 | 3          | 2.6E+08 |
| 13             | 1.5E+07 | 36         | 5.3E+08 | 3              | 4.8E+08 | 3          | 6.0E+08 |
| 14             | 2.1E+08 | 38         | 3.0E+08 | 4              | 3.3E+08 | 4          | 6.5E+08 |
| 15             | 2.3E+08 | 38         | 5.3E+08 | 4              | 4.8E+08 | 4          | 1.1E+08 |
| 16             | 1.2E+09 | 39         | 4.1E+08 | 4              | 2.3E+08 | 4          | 1.5E+08 |
| 16             | 5.9E+08 | 41         | 4.5E+08 | 4              | 2.4E+08 | 5          | 6.8E+08 |
| 20             | 5.7E+08 | 43         | 6.0E+08 | 5              | 1.8E+08 | 6          | 3.8E+08 |
| 21             | 2.8E+09 | 43         | 3.8E+08 | 5              | 3.5E+08 | 6          | 7.2E+08 |
| 26             | 8.0E+08 | 43         | 5.0E+08 | 5              | 5.3E+08 | 6          | 1.4E+08 |
| 29             | 6.8E+08 | 47         | 6.5E+08 | 5              | 5.0E+08 | 7          | 1.5E+07 |
| 29             | 4.4E+08 | 48         | 5.7E+08 | 7              | 3.2E+08 | 8          | 4.2E+08 |
| 32             | 7.2E+08 | 50         | 3.9E+08 | 8              | 5.6E+08 | 11         | 4.5E+08 |
| 36             | 5.6E+08 | 57         | 2.4E+08 | 13             | 9.6E+08 | 15         | 4.7E+08 |
| 46             | 5.3E+08 | 57         | 6.2E+08 |                |         |            |         |
| 158            | 5.0E+08 |            |         |                |         |            |         |

**Supplementary Table 6.** Raw data from reversion assays. Colonies arising after 48 hours growth on medium lacking histidine were counted for each condition and are indicated as the number of revertants. The number of viable cells per culture at the time of plating is indicated in columns labeled “cells”.

| Strain | Genotype                                                                                                              | Reference  |
|--------|-----------------------------------------------------------------------------------------------------------------------|------------|
| YB955  | <i>hisC952 metB5 leuC427 xin-1 SPβ<sup>SENS</sup></i>                                                                 | 1          |
| HM419  | <i>hisC952 metB5 leuC427 xin-1 SPβ<sup>SENS</sup><br/>amyE:: { P<sub>spank(hy)</sub>-hisC952 Head-On spc }</i>        | This Study |
| HM420  | <i>hisC952 metB5 leuC427 xin-1 SPβ<sup>SENS</sup><br/>amyE:: { P<sub>spank(hy)</sub>-hisC952 Co-Directional spc }</i> | This Study |

**Supplementary Table 7.** Strains used in this study. HM419 and HM420 were constructed as described.

| Plasmid | Genotype                                                            | Reference  |
|---------|---------------------------------------------------------------------|------------|
| pHM392  | <i>amyE:: P<sub>spank(hy)</sub>-hisC952 Head-On spc lacI</i>        | This Study |
| pHM394  | <i>amyE:: P<sub>spank(hy)</sub>-hisC952 Co-Directional spc lacI</i> | This Study |

**Supplementary Table 8.** Plasmids used in this study. pHM392 and pHM394 were constructed as described.

| Position | Nucleotide Change | Amino Acid Change | Total Number | Number Head-on | Number Co-directional |
|----------|-------------------|-------------------|--------------|----------------|-----------------------|
| 952      | T==>C             | Stop==>Gln        | 18           | 17             | 1                     |
|          | T==>A             | Stop==>Lys        |              |                |                       |
|          | T==>G             | Stop==>Glu        | 6            | 4              | 2                     |
| 953      | A==>T             | Stop==>Leu        |              |                |                       |
|          | A==>C             | Stop==>Ser        | 1            | 1              |                       |
|          | A==>G             | Stop==>Trp        | 1            |                | 1                     |
| 954      | G==>T             | Stop==>Tyr        |              |                |                       |
|          | G==>C             | Stop==>Tyr        |              |                |                       |

**Supplementary Table 9.** Table Outlining all the possible ways *hisC952* could revert and the reversions mapped from the reporter experiments. WT *hisC* gene codon 318 is a CAG (Glutamine): the *hisC952* allele has a TAG Stop codon at position 952 (C→T mutation). Twenty-four revertants from head-on and four co-directional reporter constructs were sequenced. The number for each type of reversion that was found in the *hisC* allele at *amyE* is shown.

**A. Co-directional Conflict (Gene coded for on Leading strand)**

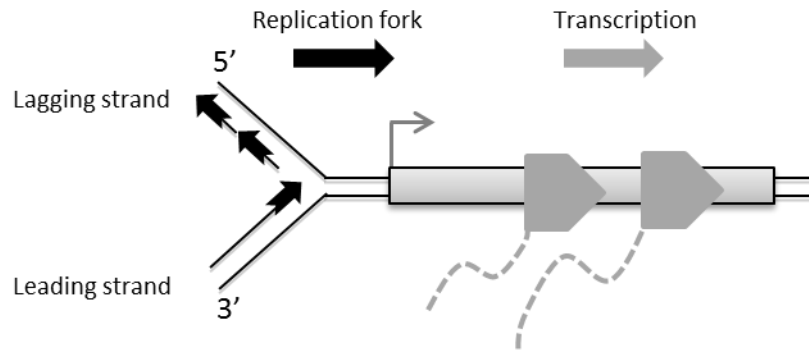

**B. Head-on Conflict (Gene coded for on Lagging Strand)**

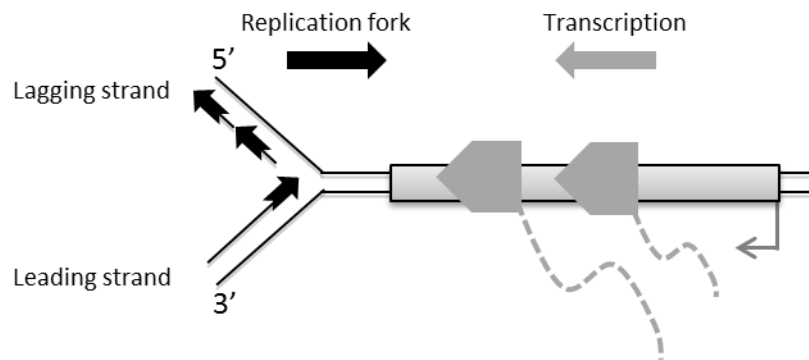

**Supplementary Figure 1.** Cartoon schematic of conflicts in the two orientations. The replication fork is indicated in black arrows, RNA polymerases are indicated as gray pentagons, mRNA is indicated as dashed lines, and the promoter and the direction of the gene is indicated as a gray arrow, pointing in the same direction as the gene and the movement of RNA polymerases. **A.** Co-directional conflicts between the replication and transcription machineries occur when a gene is encoded on the leading strand. In these conflicts, transcription occurs in the same direction as leading-strand replication. **B.** Head-on conflicts between the replication and transcription machineries occur when a gene is encoded on the lagging strand. In these conflicts, transcription occurs in the opposite direction to leading-strand replication.

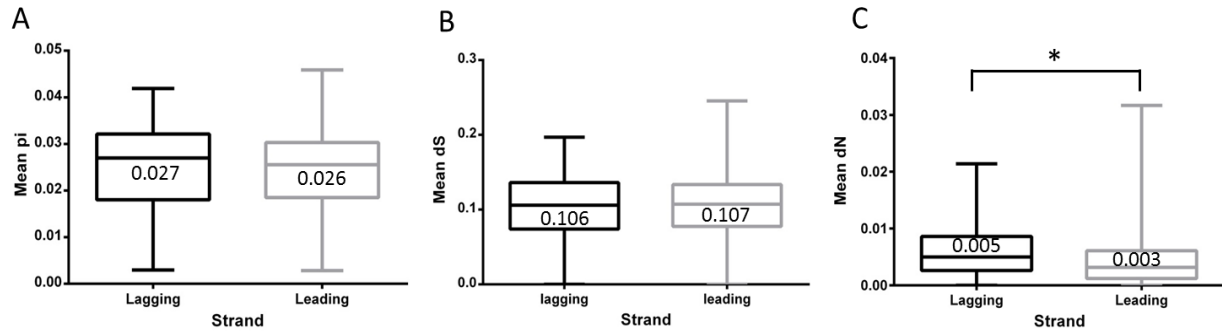

**Supplementary Figure 2.** Box and whisker plot of the mean values for  $\pi$  (A), dS (B) and dN (C) are plotted for the leading (gray) and lagging (black) strands. The ranges of the original data are represented by bars (min and max values) and boxes (25-75%). The line in the box represents the median and the median values are mentioned. Values for dN in the two strands are significantly different ( $p < 0.0001$ , indicated by \*) by Mann Whitney test (two tailed).

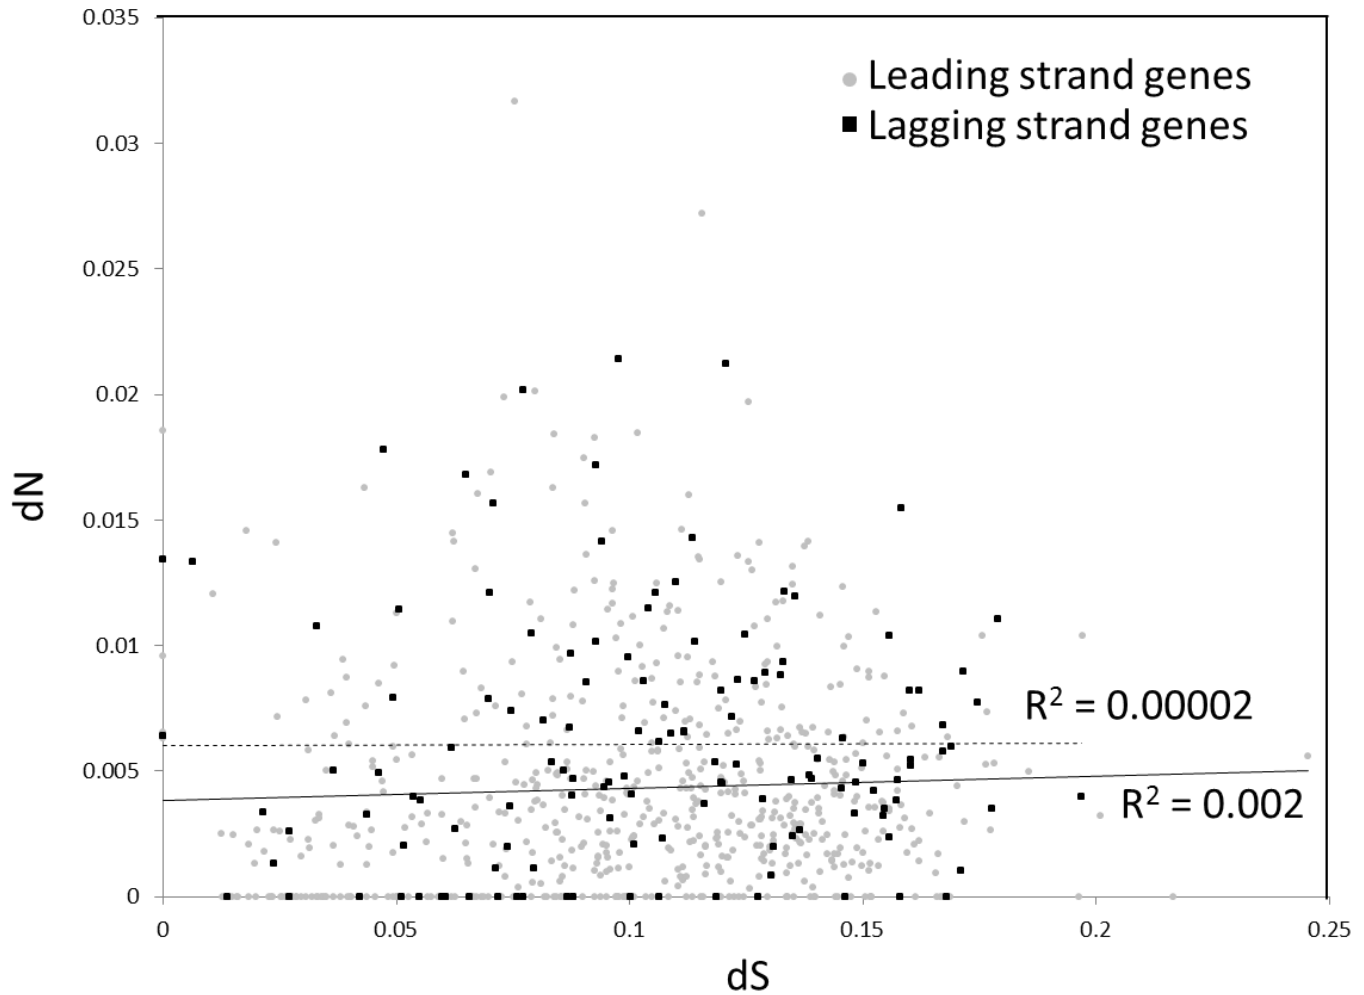

**Supplementary Figure 3.** Plot of mean dS vs mean dN values for 627 and 132 gene-set analyzed from leading (gray dots) and lagging (black square) stand of replication respectively. The trend lines showing no correlation between the dS and dN values (dotted lines for lagging strand genes and black line for leading strand genes).

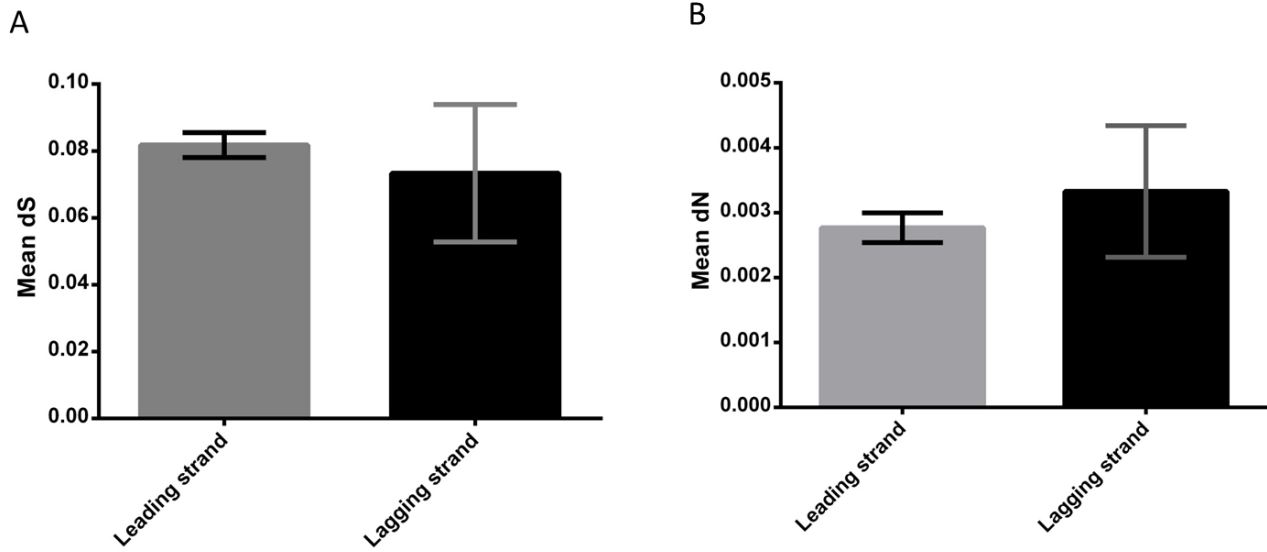

**Supplementary Figure 4.** Average rate of accumulation of (A) synonymous (dS) and (B) non-synonymous changes (dN) and standard error of mean for core essential genes on the leading (142 genes) and lagging (6 genes) strand.

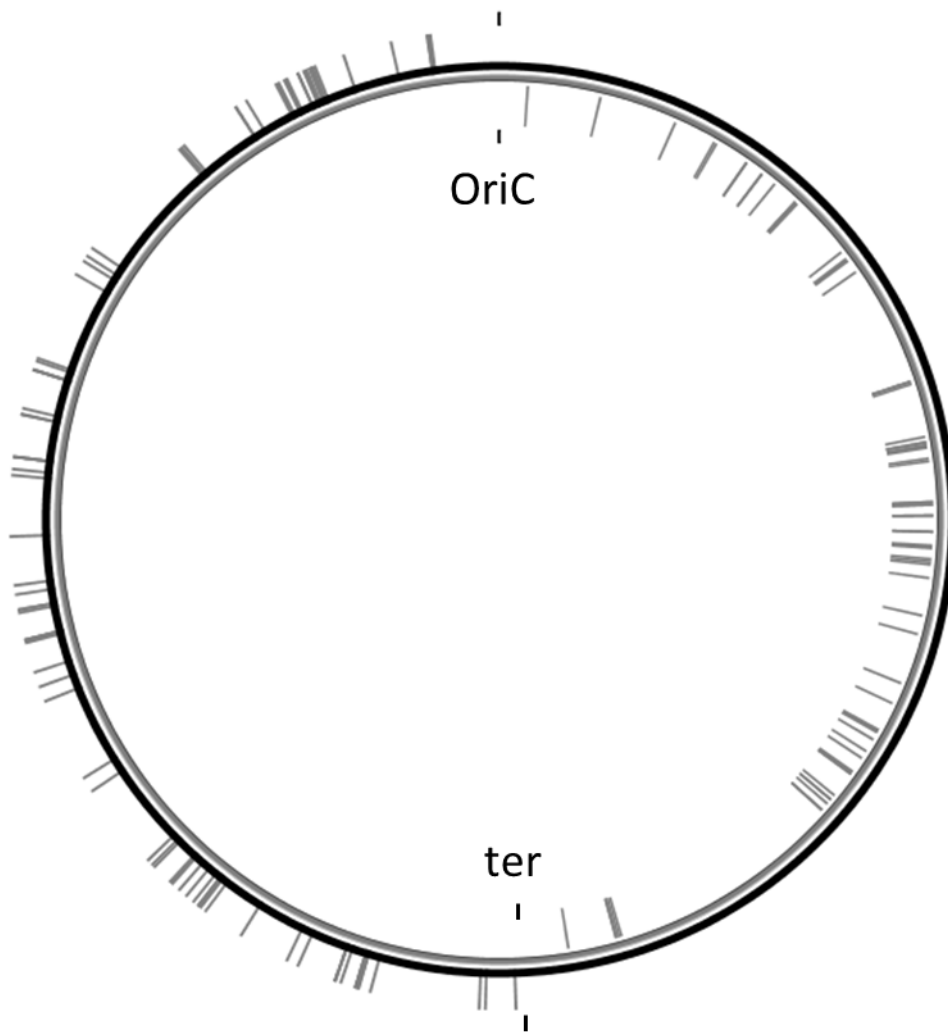

**Supplementary Figure 5.** Schematic view of circular maps of *B. subtilis* str. 168 genome showing distribution of 132 lagging strand genes under study. This plot was generated by using CG view software<sup>2</sup>.

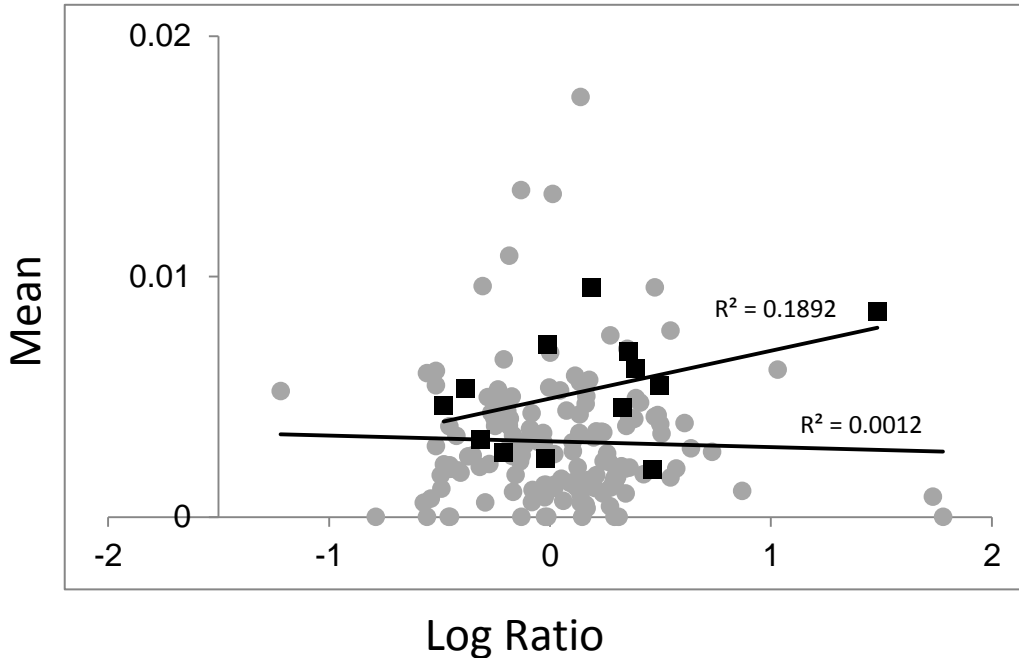

**Supplementary Figure 6.** Plot of gene expression data (Log Ratio (635/532)) with the mean dN of any gene for leading strand (gray) and lagging strand (black). The comparison of regression lines of leading and lagging strand population show that the two slopes are significantly ( $p=0.0076$ ) different. See supplementary methods.

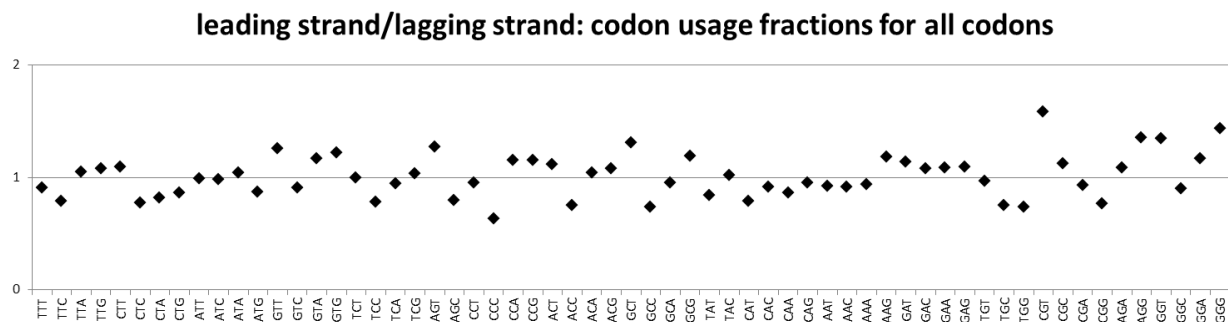

**Supplementary Figure 7.** Codon usage bias of the genes in the two strands. The codon usage fraction for all codons, except for the stop codons, TAA, TAG and TGA, were analyzed in the core genes in both the leading and the lagging strands. The codon fraction was found by dividing the number of each codon with total number of codons in that gene, for each strand. The average fraction of usage was determined for each codon, for all five strains analyzed, and the ratio between the leading and the lagging strand usage fractions is plotted per codon. A ratio of 1 indicates no difference between usage fractions in the two strands. See supplementary methods.



## Supplementary Methods:

**Gene expression analysis and correlative comparisons to dN.** We used the GEO accession GSM978786 dataset for *B. subtilis* to pull out the expression value of each gene. We analyzed genes only with 300 or more amino acid lengths from leading (142) and lagging (13) strand. When we plotted the expression in terms of Log Ratio (635/532) versus mean nonsynonymous substitution rate (dN) we found a positive correlation between them for lagging strand genes whereas there was a negative correlation for leading strand genes. We divided the leading and lagging strand values into two parts, according to the median value of their dN distribution (0.00256 for leading and 0.00532 for lagging), and calculated the median of transformed Log Ratio values for each parts corresponding to low or high dN values.

**Calculation of codon usage fractions.** In order to calculate the codon usage fraction of individual protein coding genes, we used an in-house software which finds the number of each of the 64 codons of any given gene and then calculates the codon usage fraction by dividing the number of each codon with the total number of codons in that gene. We have gene sequence data for 627 leading strand genes and 132 lagging strand genes for the five *B. subtilis* strains used in this study. Using this software, we calculated the codon usage frequency of the 627 leading strand and 132 lagging strand genes.

## Supplementary References:

- 1 Yasbin, R. E., R. Miehler-Lester, and P. E. Love. *Mutagenesis in Bacillus subtilis*. Vol. 86 73-84 (1987).
- 2 Stothard, P. & Wishart, D. S. Circular genome visualization and exploration using CGView. *Bioinformatics* **21**, 537-539, doi:10.1093/bioinformatics/bti054 (2005).
